# Supplementary material
Source: publisher site journal article supplement (https://www.dovepress.com/article/480112)
Supplement: Supplementary file 1 [file get_supplementary_file.php]

| **Supplementary Table 1 Primer sequences for RT-qPCR** | | |
| --- | --- | --- |
| Primer | Species | Sequence |
| TNF-α-F | Mouse | GGTGCCTATGTCTCAGCCTCTT |
| TNF-α-R | Mouse | GCCATAGAACTGATGAGAGGGAG |
| IL-33-F | Mouse | CTACTGCATGAGACTCCGTTCTG |
| IL-33-R | Mouse | AGAATCCCGTGGATAGGCAGAG |
| IL-1β-F | Mouse | TGGACCTTCCAGGATGAGGACA |
| IL-1β-R | Mouse | GTTCATCTCGGAGCCTGTAGTG |
| MUC1-F | Mouse | AGTGCCTCTGACGTGAAGTCAC |
| MUC1-R | Mouse | GGGAGGGAACTGCATCTCATTC |
| MUC4-F | Mouse | AAGCGTGTTGCCTCTTCACCTG |
| MUC4-R | Mouse | AGGTGGCTGAGACTGCTGTGTT |
| MUC5B-F | Mouse | CTGAAGACCTGTCGGAACCCAA |
| MUC5B-R | Mouse | GCCACACACTTCATCTGGTCCT |
| MUC5AC-F | Mouse | CCACTTTCTCCTTCTCCACACC |
| MUC5AC-R | Mouse | GGTTGTCGATGCAGCCTTGCTT |
| MUC20-F | Mouse | ATGGAGGCTTCCTCCTTGTACG |
| MUC20-R | Mouse | ACCAGATGGCTCGTGAGTCACT |
| β-actin-F | Mouse | CATTGCTGACAGGATGCAGAAGG |
| β-actin-R | Mouse | TGCTGGAAGGTGGACAGTGAGG |

**Supplementary figure FTSJRF Components Identification Total Ion Flow Chart**

FTSJRF was analyzed using UltiMate 3000 RS chromatographic instrument and Q Exactive high-resolution mass spectrometer (Thermo Fisher Scientific, USA). The chromatographic conditions for analysis of FTSJRF were as follows: Column: AQ-C18, 150×2.1mm, 1.8 µm, Welch; Water phase: 0.1% formic acid/aqueous solution; Organic phase: methanol; Column thermostat: 35℃; Loading volume: 5 μL; Flow rate: 0.3 mL / min. The detailed results are shown in the figure below.

Note: The black color in column 1 represents the total ion flow chart in negative ion mode, while the red color in column 2 represents the total ion flow chart in positive ion mode.

**Supplementary table 2 components of FTSJRF**

| Name | Formula | Calc. MW | m/z | RT [min] | Reference Ion | Area: CD128_ZC.raw (F544) |
| --- | --- | --- | --- | --- | --- | --- |
| Oleanolic acid | C30 H48 O3 | 456.36027 | 455.35294 | 21.786 | [M-H]-1 | 150970352.3 |
| Adenosine | C10 H13 N5 O4 | 267.09651 | 268.10376 | 4.501 | [M+H]+1 | 8495287580 |
| L-Norleucine | C6 H13 N O2 | 131.0947 | 132.10197 | 2.594 | [M+H]+1 | 7556702913 |
| D-(+)-Proline | C5 H9 N O2 | 115.06355 | 116.07084 | 1.388 | [M+H]+1 | 16164925604 |
| L-Histidine | C6 H9 N3 O2 | 155.06952 | 156.0768 | 1.193 | [M+H]+1 | 258055508.9 |
| 16,17-Dihydroxykauran-18-oic acid | C20 H32 O4 | 336.23016 | 335.2229 | 17.004 | [M-H]-1 | 22512245.19 |
| Linoleic Acid | C18 H32 O2 | 280.24015 | 279.23288 | 22.008 | [M-H]-1 | 75226573.16 |
| Dipropyleneglycol dibenzoate | C20 H22 O5 | 342.14635 | 343.15366 | 18.081 | [M+H]+1 | 1159732206 |
| (1S,3R,4S,5R)-3,5-bis({[(2E)-3-(3,4-dihydroxyphenyl)prop-2-enoyl]oxy})-1,4-dihydroxycyclohexane-1-carboxylic acid | C25 H24 O12 | 516.12708 | 517.13434 | 12.388 | [M+H]+1 | 497228204.4 |
| L-Phenylalanine | C9 H11 N O2 | 148.05246 | 166.08629 | 5.184 | [M+NH4]+1 | 4276601546 |
| Chlorogenic acid | C16 H18 O9 | 354.09483 | 353.08765 | 9.736 | [M-H]-1 | 2043909608 |
| (1S,3R,4S,5R)-3,5-bis({[(2E)-3-(3,4-dihydroxyphenyl)prop-2-enoyl]oxy})-1,4-dihydroxycyclohexane-1-carboxylic acid | C25 H24 O12 | 516.12687 | 517.13416 | 10.348 | [M+H]+1 | 316421549.5 |
| 3-{[(2S,3R,4S,5S,6R)-6-({[(2R,3R,4R)-3,4-dihydroxy-4-(hydroxymethyl)oxolan-2-yl]oxy}methyl)-3,4,5-trihydroxyoxan-2-yl]oxy}-2-methyl-4H-pyran-4-one | C17 H24 O12 | 420.12689 | 421.134 | 6.918 | [M+H]+1 | 28007466.98 |
| Nicotinic acid | C6 H5 N O2 | 123.03236 | 124.03963 | 2.162 | [M+H]+1 | 733282324.1 |
| (1r,3R,4s,5S)-4-{[(2E)-3-(3,4-dihydroxyphenyl)prop-2-enoyl]oxy}-1,3,5-trihydroxycyclohexane-1-carboxylic acid | C16 H18 O9 | 354.09491 | 355.10223 | 12.391 | [M+H]+1 | 291834565.8 |
| DL-Tryptophan | C11 H12 N2 O2 | 204.0898 | 188.07053 | 7.202 | [M+H-NH3]+1 | 2711306754 |
| Vitamin E Acetate | C31 H52 O3 | 472.39109 | 490.4249 | 27.439 | [M+NH4]+1 | 1062430450 |
| Di(2-ethylhexyl) phthalate | C24 H38 O4 | 390.27655 | 391.28381 | 21.128 | [M+H]+1 | 881127945.9 |
| 4-Hydroxybenzaldehyde | C7 H6 O2 | 122.0355 | 121.02821 | 9.519 | [M-H]-1 | 342920221.1 |
| 2,3,4,9-Tetrahydro-1H-β-carboline-3-carboxylic acid | C12 H12 N2 O2 | 216.08998 | 217.09729 | 8.478 | [M+H]+1 | 278639733.2 |
| 5'-S-Methyl-5'-thioadenosine | C11 H15 N5 O3 S | 297.08956 | 298.09683 | 7.859 | [M+H]+1 | 137719203.8 |
| (±)12(13)-DiHOME | C18 H34 O4 | 314.24547 | 313.23834 | 18.287 | [M-H]-1 | 583083230.6 |
| Di(2-ethylhexyl) phthalate | C24 H38 O4 | 390.27614 | 391.28339 | 22.908 | [M+H]+1 | 677801356.9 |
| Dipropyleneglycol dibenzoate | C20 H22 O5 | 342.14655 | 343.15387 | 17.786 | [M+H]+1 | 99139748.29 |
| Isoliquiritigenin | C15 H12 O4 | 256.07308 | 257.08035 | 11.728 | [M+H]+1 | 4581556302 |
| Salicylic acid | C7 H6 O3 | 138.03039 | 137.02312 | 12.714 | [M-H]-1 | 836936693.2 |
| Ononin | C22 H22 O9 | 430.12608 | 431.13321 | 13.27 | [M+H]+1 | 1848880614 |
| DL-Homoserine | C4 H9 N O3 | 119.0585 | 120.06578 | 1.267 | [M+H]+1 | 900276521.6 |
| 4-Oxoproline | C5 H7 N O3 | 129.04134 | 128.03404 | 2.674 | [M-H]-1 | 3238797572 |
| Citraconic acid | C5 H6 O4 | 130.02547 | 129.01819 | 5.548 | [M-H]-1 | 178130402 |
| Isoliquiritigenin | C15 H12 O4 | 256.07337 | 257.08063 | 13.506 | [M+H]+1 | 441164984.9 |
| Isoliquiritigenin | C15 H12 O4 | 256.07326 | 257.08054 | 11.345 | [M+H]+1 | 577914965.1 |
| Bis(4-ethylbenzylidene)sorbitol | C24 H30 O6 | 414.20378 | 415.21106 | 17.477 | [M+H]+1 | 204034832.7 |
| Formononetin | C16 H12 O4 | 268.07337 | 269.08057 | 15.723 | [M+H]+1 | 1488255838 |
| 4-[(2S,3S,4S)-4-[4-(β-D-Glucopyranosyloxy)-3-methoxybenzyl]-3-(hydroxymethyl)tetrahydro-2-furanyl]-2-methoxyphenyl β-D-glucopyranoside | C32 H44 O16 | 701.28935 | 702.29663 | 9.997 | [M+H]+1 | 68834867.97 |
| Tangeritin | C20 H20 O7 | 372.12057 | 373.12784 | 17.372 | [M+H]+1 | 1787182157 |
| Dibutyl phthalate | C16 H22 O4 | 278.15163 | 279.15891 | 18.418 | [M+H]+1 | 1884578610 |
| 2,3-Dihydro-1-benzofuran-2-carboxylic acid | C9 H8 O3 | 164.04628 | 163.039 | 11.304 | [M-H]-1 | 225905941.9 |
| Quercetin-3β-D-glucoside | C21 H20 O12 | 464.09565 | 463.08847 | 12.806 | [M-H]-1 | 474854896.3 |
| Hesperidin | C28 H34 O15 | 610.18895 | 611.19604 | 12.571 | [M+H]+1 | 5974504101 |
| Pimelic acid | C7 H12 O4 | 160.07249 | 159.06522 | 9.791 | [M-H]-1 | 59170217.68 |
| 5-Hydroxymethyl-2-furaldehyde | C6 H6 O3 | 126.03197 | 127.03925 | 5.814 | [M+H]+1 | 1539482761 |
| Prunin | C21 H22 O10 | 434.12099 | 435.12827 | 12.189 | [M+H]+1 | 205425418 |
| Trigonelline | C7 H7 N O2 | 137.04764 | 138.05492 | 1.437 | [M+H]+1 | 2563678095 |
| 2'-O-Methyladenosine | C11 H15 N5 O4 | 281.11257 | 282.11984 | 5.849 | [M+H]+1 | 189291849.4 |
| Bis(4-ethylbenzylidene)sorbitol | C24 H30 O6 | 414.20381 | 432.23773 | 17.06 | [M+NH4]+1 | 1569754369 |
| Citraconic acid | C5 H6 O4 | 130.02537 | 129.0181 | 4.273 | [M-H]-1 | 202679350.7 |
| Citraconic acid | C5 H6 O4 | 130.02537 | 129.0181 | 4.698 | [M-H]-1 | 162536613.4 |
| (2R,3S,4S,5R,6S)-2-(hydroxymethyl)-6-{4-[(1E)-3-hydroxyprop-1-en-1-yl]-2,6-dimethoxyphenoxy}oxane-3,4,5-triol | C17 H24 O9 | 372.14172 | 390.17551 | 9.45 | [M+NH4]+1 | 311560328.8 |
| DL-Stachydrine | C7 H13 N O2 | 143.09465 | 144.10193 | 1.854 | [M+H]+1 | 7484738527 |
| Lariciresinol 4-O-glucoside | C26 H34 O11 | 476.22814 | 540.2439 | 11.082 | [M+ACN+Na]+1 | 55771410.93 |
| Rubiadin | C15 H10 O4 | 254.05758 | 253.05031 | 18.435 | [M-H]-1 | 110194075.6 |
| Coniferin | C16 H22 O8 | 359.15785 | 360.16513 | 8.923 | [M+H]+1 | 68202707.63 |
| Bis(4-ethylbenzylidene)sorbitol | C24 H30 O6 | 414.20398 | 415.21118 | 16.617 | [M+H]+1 | 100597669.7 |
| (4S)-4-[(3aS,4S,7aR)-4-Hydroxy-6-methyl-3-methylene-2-oxo-2,3,3a,4,7,7a-hexahydro-1-benzofuran-5-yl]pentyl acetate | C17 H24 O5 | 308.16191 | 309.16916 | 13.761 | [M+H]+1 | 9196982251 |
| Caffeic acid | C9 H8 O4 | 180.04134 | 179.03406 | 10.031 | [M-H]-1 | 1001011255 |
| Adenine | C5 H5 N5 | 135.05463 | 136.0619 | 1.845 | [M+H]+1 | 547485826 |
| (1r,3R,4s,5S)-4-{[(2E)-3-(3,4-dihydroxyphenyl)prop-2-enoyl]oxy}-1,3,5-trihydroxycyclohexane-1-carboxylic acid | C16 H18 O9 | 336.08437 | 337.09164 | 10.352 | [M+H]+1 | 45943086.26 |
| Azelaic acid | C9 H16 O4 | 188.1041 | 187.09666 | 13.236 | [M-H]-1 | 3580670154 |
| Guanine | C5 H5 N5 O | 134.02297 | 152.05679 | 5.232 | [M+NH4]+1 | 1249925901 |
| Salicylic acid | C7 H6 O3 | 138.03053 | 137.02324 | 8.215 | [M-H]-1 | 492119672.2 |
| Citroflex A-4 | C20 H34 O8 | 402.22504 | 403.23236 | 19.369 | [M+H]+1 | 79604307.26 |
| 2-(Acetylamino)hexanoic acid | C8 H15 N O3 | 173.10422 | 172.09694 | 10.392 | [M-H]-1 | 85795089.76 |
| Azelaic acid | C9 H16 O4 | 188.10413 | 187.09683 | 13.783 | [M-H]-1 | 265037059.2 |
| Terephthalic acid | C8 H6 O4 | 166.02553 | 165.01825 | 9.682 | [M-H]-1 | 663869745.6 |
| Formononetin | C16 H12 O4 | 268.07368 | 267.06641 | 14.485 | [M-H]-1 | 360625360 |
| 1,4-dihydroxy-6,6,9a-trimethyl-1H,3H,4H,5H,5aH,6H,7H,8H,9H,9aH-naphtho[1,2-c]furan-3-one | C15 H22 O4 | 288.13347 | 289.14075 | 13.215 | [M+H]+1 | 194537976.6 |
| Glucose 1-phosphate | C6 H13 O9 P | 260.02965 | 261.03702 | 1.687 | [M+H]+1 | 535370119.9 |
| Citric acid | C6 H8 O7 | 192.02625 | 191.01883 | 2.698 | [M-H]-1 | 24025890819 |
| 5,7-dihydroxy-2-(4-hydroxy-3-methoxyphenyl)-3-{[3,4,5-trihydroxy-6-(hydroxymethyl)oxan-2-yl]oxy}-4H-chromen-4-one | C22 H22 O12 | 478.11112 | 477.10391 | 13.537 | [M-H]-1 | 264350727.3 |
| 2-(Acetylamino)hexanoic acid | C8 H15 N O3 | 173.10428 | 172.097 | 10.742 | [M-H]-1 | 45148542.98 |
| Gallic acid | C7 H6 O5 | 170.0206 | 169.01332 | 5.114 | [M-H]-1 | 521056148.2 |
| 2-[(4-hydroxy-3,5-dimethoxyphenyl)methoxy]-6-(hydroxymethyl)oxane-3,4,5-triol | C15 H22 O9 | 363.15267 | 364.15994 | 7.526 | [M+H]+1 | 104069662.4 |
| Licochalcone A | C21 H22 O4 | 338.15171 | 339.15894 | 17.668 | [M+H]+1 | 231324319.8 |
| Prostaglandin F2α 1-11-lactone | C20 H32 O4 | 318.21945 | 317.21219 | 17.53 | [M-H]-1 | 109339777.7 |
| Naringeninchalcone | C15 H12 O5 | 272.0685 | 273.07578 | 11.484 | [M+H]+1 | 87306654.25 |
| Dibutyl sebacate | C18 H34 O4 | 314.24539 | 315.25269 | 20.921 | [M+H]+1 | 47286297.34 |
| N6-Me-Adenosine | C11 H15 N5 O4 | 281.11247 | 282.11975 | 6.439 | [M+H]+1 | 38100917.49 |
| 9-Oxo-10(E),12(E)-octadecadienoic acid | C18 H30 O3 | 294.21932 | 295.22656 | 19.235 | [M+H]+1 | 956985549.6 |
| L-Glutathione (reduced) | C10 H17 N3 O6 S | 307.08388 | 308.09116 | 2.005 | [M+H]+1 | 124726496.6 |
| Isoliquiritigenin | C15 H12 O4 | 256.07342 | 257.08069 | 15.5 | [M+H]+1 | 120788288.2 |
| (2S,3R,4S,5S,6R)-2-{4-[(1R,3aR,4R,6aR)-4-(3,5-dimethoxy-4-{[(2S,3R,4S,5S,6R)-3,4,5-trihydroxy-6-(hydroxymethyl)oxan-2-yl]oxy}phenyl)-hexahydrofuro[3,4-c]furan-1-yl]-2,6-dimethoxyphenoxy}-6-(hydroxymethyl)oxane-3,4,5-triol | C34 H46 O18 | 759.29436 | 760.30164 | 11.137 | [M+H]+1 | 148977902.2 |
| Glycyl-L-leucine | C8 H16 N2 O3 | 188.11601 | 189.12346 | 4.893 | [M+H]+1 | 65761685.02 |
| (11E,15Z)-9,10,13-trihydroxyoctadeca-11,15-dienoic acid | C18 H32 O5 | 350.20717 | 351.21445 | 16.445 | [M+H]+1 | 598705825.8 |
| Stearamide | C18 H37 N O | 283.28737 | 284.29465 | 22.62 | [M+H]+1 | 164558696.3 |
| (±)13-HODE | C18 H32 O3 | 296.23503 | 295.22775 | 19.303 | [M-H]-1 | 864078031.5 |
| L(-)-Pipecolinic acid | C6 H11 N O2 | 129.07911 | 130.08638 | 1.477 | [M+H]+1 | 2102068617 |
| Citric acid | C6 H8 O7 | 192.02624 | 191.01897 | 4.928 | [M-H]-1 | 1234118781 |
| Docosanamide | C22 H45 N O | 339.34978 | 340.35706 | 20.635 | [M+H]+1 | 260533270.3 |
| Lariciresinol 4-O-glucoside | C26 H34 O11 | 522.21025 | 521.20288 | 11.424 | [M-H]-1 | 53222534.51 |
| Choline | C5 H13 N O | 103.10018 | 104.10746 | 1.568 | [M+H]+1 | 889782711.4 |
| Citric acid | C6 H8 O7 | 192.02626 | 191.01898 | 4.249 | [M-H]-1 | 1224883328 |
| 2-(8-Hydroxy-4a,8-dimethyldecahydro-2-naphthalenyl)acrylic acid | C15 H24 O3 | 252.17237 | 251.16518 | 17.811 | [M-H]-1 | 48008017.2 |
| 18-β-Glycyrrhetinic acid | C30 H46 O4 | 470.33958 | 471.34683 | 20.748 | [M+H]+1 | 60460610.39 |
| Phenethylamine | C8 H11 N | 104.06298 | 122.09676 | 4.786 | [M+NH4]+1 | 86498520.31 |
| Naringenin | C15 H12 O5 | 272.06816 | 273.07544 | 11.759 | [M+H]+1 | 100027019.1 |
| Prunin | C21 H22 O10 | 434.1211 | 435.12872 | 10.581 | [M+H]+1 | 36019439.77 |
| (2S,3R,4S,5S,6R)-2-{4-[(1S,3aR,4S,6aR)-4-(4-hydroxy-3,5-dimethoxyphenyl)-hexahydrofuro[3,4-c]furan-1-yl]-2,6-dimethoxyphenoxy}-6-(hydroxymethyl)oxane-3,4,5-triol | C28 H36 O13 | 597.2415 | 598.24878 | 12.174 | [M+H]+1 | 135579001.9 |
| Uracil | C4 H4 N2 O2 | 112.02776 | 113.03503 | 3.512 | [M+H]+1 | 356557546.8 |
| 1,7-Bis(4-hydroxyphenyl)-3,5-heptanediol | C19 H24 O4 | 316.16758 | 315.16022 | 13.55 | [M-H]-1 | 32191188.91 |
| D-(-)-Quinic acid | C7 H12 O6 | 192.06243 | 191.05515 | 1.489 | [M-H]-1 | 2767796776 |
| Corchorifatty acid F | C18 H32 O5 | 328.22481 | 327.21753 | 15.828 | [M-H]-1 | 1213472532 |
| L(-)-Pipecolinic acid | C6 H11 N O2 | 129.07918 | 130.08646 | 1.856 | [M+H]+1 | 1069956025 |
| Choline | C5 H13 N O | 103.10015 | 104.10742 | 1.232 | [M+H]+1 | 3037146456 |
| 2-(8-Hydroxy-4a,8-dimethyldecahydro-2-naphthalenyl)acrylic acid | C15 H24 O3 | 252.17244 | 251.16516 | 17.325 | [M-H]-1 | 76129181.44 |
| Lariciresinol 4-O-glucoside | C26 H34 O11 | 522.21024 | 567.20844 | 11.064 | [M+FA-H]-1 | 68150905.11 |
| (+/-)9-HpODE | C18 H32 O4 | 312.23029 | 311.22302 | 18.084 | [M-H]-1 | 554541726.4 |
| (2S,3R,4S,5S,6R)-2-{4-[(1E)-3-hydroxyprop-1-en-1-yl]-2,6-dimethoxyphenoxy}-6-({[(2R,3R,4S,5S,6R)-3,4,5-trihydroxy-6-(hydroxymethyl)oxan-2-yl]oxy}methyl)oxane-3,4,5-triol | C23 H34 O14 | 551.22161 | 552.22888 | 9.019 | [M+H]+1 | 25218091.99 |
| Citric acid | C6 H8 O7 | 192.02608 | 191.0188 | 12.556 | [M-H]-1 | 601884770.9 |
| Hexadecanamide | C16 H33 N O | 255.25594 | 256.26321 | 21.449 | [M+H]+1 | 135052971.9 |
| 2-[(2S,4aR,8aS)-2-Hydroxy-4a-methyl-8-methylenedecahydro-2-naphthalenyl]acrylic acid | C15 H22 O3 | 250.15678 | 233.15355 | 17.681 | [M+H-H2O]+1 | 354685599.3 |
| 2-[3,8-Dihydroxy-8-(hydroxymethyl)-3-methyl-2-oxodecahydro-5-azulenyl]-2-propanyl hexopyranoside | C21 H36 O10 | 465.25765 | 466.26492 | 8.755 | [M+H]+1 | 87353469.54 |
| (2Z)-6-hydroxy-2-[(4-hydroxy-3-methoxyphenyl)methylidene]-2,3-dihydro-1-benzofuran-3-one | C16 H12 O5 | 284.06832 | 285.0755 | 14.264 | [M+H]+1 | 1666984835 |
| Phenylephrine | C9 H13 N O2 | 167.09455 | 150.09126 | 1.426 | [M+H-H2O]+1 | 3809403218 |
| Suberic acid | C8 H14 O4 | 174.08816 | 173.08089 | 11.683 | [M-H]-1 | 236509332.2 |
| 1-Stearoylglycerol | C21 H42 O4 | 358.30745 | 381.29657 | 22.908 | [M+Na]+1 | 8559375089 |
| L-Histidine | C6 H9 N3 O2 | 155.06839 | 154.06111 | 1.135 | [M-H]-1 | 179113340.8 |
| Matairesinol | C20 H22 O6 | 358.14156 | 359.14871 | 13.666 | [M+H]+1 | 55835832.45 |
| 13(S)-HOTrE | C18 H30 O3 | 294.21941 | 295.22668 | 18.08 | [M+H]+1 | 566899085.8 |
| Naringenin | C15 H12 O5 | 272.06816 | 273.07544 | 12.526 | [M+H]+1 | 134337136.6 |
| 18-β-Glycyrrhetinic acid | C30 H46 O4 | 470.33921 | 453.33591 | 18.774 | [M+H-H2O]+1 | 2392384844 |
| Leucylproline | C11 H20 N2 O3 | 228.14748 | 229.15475 | 6.834 | [M+H]+1 | 393708872.8 |
| 16-Hydroxyhexadecanoic acid | C16 H32 O3 | 272.2353 | 271.22803 | 19.287 | [M-H]-1 | 54932139.93 |
| Adenosine 3'5'-cyclic monophosphate | C10 H12 N5 O6 P | 329.05239 | 330.0596 | 4.838 | [M+H]+1 | 411819944.6 |
| Nobiletin | C21 H22 O8 | 402.13106 | 403.13834 | 16.838 | [M+H]+1 | 4295161948 |
| Methylsuccinic acid | C5 H8 O4 | 132.04107 | 131.0338 | 5.963 | [M-H]-1 | 106762446 |
| D-(+)-Pyroglutamic Acid | C5 H7 N O3 | 129.04276 | 130.05003 | 2.703 | [M+H]+1 | 6653602859 |
| Formononetin | C16 H12 O4 | 268.07374 | 267.06647 | 14.163 | [M-H]-1 | 37909494.31 |
| Didecyl phthalate | C28 H46 O4 | 446.33921 | 447.34647 | 25.438 | [M+H]+1 | 256543197.1 |
| Dihexyl nonanedioate | C21 H40 O4 | 263.22481 | 264.23209 | 12.658 | [M+H]+1 | 118652619.5 |
| (2R,3S,4S,5R,6R)-2-(hydroxymethyl)-6-(2-phenylethoxy)oxane-3,4,5-triol | C14 H20 O6 | 301.15242 | 302.1597 | 10.977 | [M+H]+1 | 134053904.8 |
| Naringeninchalcone | C15 H12 O5 | 272.06853 | 273.07581 | 10.595 | [M+H]+1 | 84411867.56 |
| Naringeninchalcone | C15 H12 O5 | 272.06807 | 273.07538 | 12.19 | [M+H]+1 | 290714885 |
| Glycitin | C22 H22 O10 | 446.12078 | 447.12805 | 11.668 | [M+H]+1 | 1875262882 |
| 4-[(2S,3S,4S)-4-[4-(β-D-Glucopyranosyloxy)-3-methoxybenzyl]-3-(hydroxymethyl)tetrahydro-2-furanyl]-2-methoxyphenyl β-D-glucopyranoside | C32 H44 O16 | 684.26311 | 729.26129 | 9.997 | [M+FA-H]-1 | 101690417.7 |
| Hesperetin | C16 H14 O6 | 302.07869 | 303.08585 | 12.565 | [M+H]+1 | 914433193.9 |
| Dantron | C14 H8 O4 | 240.0419 | 239.03462 | 17.082 | [M-H]-1 | 473155220 |
| α-Eleostearic acid | C18 H30 O2 | 278.22426 | 279.23154 | 19.32 | [M+H]+1 | 1624279839 |
| 2-(4-Hydroxyphenyl)ethyl 6-O-[(2R,3R,4R)-3,4-dihydroxy-4-(hydroxymethyl)tetrahydro-2-furanyl]-beta-D-glucopyranoside | C19 H28 O11 | 449.18984 | 450.19711 | 8.925 | [M+H]+1 | 22544053.93 |
| Formononetin | C16 H12 O4 | 268.0732 | 301.10678 | 13.231 | [M+H+MeOH]+1 | 264206107.7 |
| 7-Methyl-3-methylene-6-(3-oxobutyl)-3,3a,4,7,8,8a-hexahydro-2H-cyclohepta[b]furan-2-one | C15 H20 O3 | 248.14115 | 231.13786 | 14.733 | [M+H-H2O]+1 | 823193185.5 |
| Genistein | C15 H10 O5 | 270.05282 | 269.04553 | 17.709 | [M-H]-1 | 416775057.8 |
| Resorcinol monoacetate | C8 H8 O3 | 152.04625 | 151.03897 | 9.311 | [M-H]-1 | 42878177.26 |
| Didecyl phthalate | C28 H46 O4 | 446.33925 | 447.34653 | 24.454 | [M+H]+1 | 85921254.99 |
| (2S,3R,4S,5R)-2-{[(2R,3R,4S,5S,6R)-4,5-dihydroxy-6-(hydroxymethyl)-2-(2-phenylethoxy)oxan-3-yl]oxy}oxane-3,4,5-triol | C19 H28 O10 | 451.20529 | 434.202 | 11.015 | [M+H-H2O]+1 | 219882711 |
| D-(+)-Glucose | C6 H12 O6 | 180.06343 | 198.09726 | 1.603 | [M+NH4]+1 | 1904075060 |
| 6-Hydroxycaproic acid | C6 H12 O3 | 132.07733 | 131.07005 | 10.306 | [M-H]-1 | 143423283.8 |
| 5,7-Dihydroxy-2-(4-hydroxyphenyl)-6,8-bis[3,4,5-trihydroxy-6-(hydroxymethyl)tetrahydro-2H-pyran-2-yl]-4H-chromen-4-one | C27 H30 O15 | 534.13752 | 593.15137 | 10.792 | [M-H+HAc]-1 | 341557178.2 |
| Sinapine | C16 H23 N O5 | 309.15761 | 310.16489 | 8.449 | [M+H]+1 | 41341816.58 |
| Oleanolic acid | C30 H48 O3 | 456.36052 | 455.35324 | 25.813 | [M-H]-1 | 37605226.47 |
| (1S,2S,4R,7E,11S)-4,8-dimethyl-12-methylidene-3,14-dioxatricyclo[9.3.0.0Â?,â´]tetradec-7-en-13-one | C15 H20 O3 | 248.14114 | 231.13785 | 15.449 | [M+H-H2O]+1 | 684033110.9 |
| N,N'-Dicyclohexylurea | C13 H24 N2 O | 224.18868 | 225.19595 | 16.085 | [M+H]+1 | 158129430.2 |
| Ferulic acid | C10 H10 O4 | 194.05775 | 177.05458 | 11.66 | [M+H-H2O]+1 | 132155215.9 |
| (3aS,5aR,6R,9aS,9bS)-6-hydroxy-5a-methyl-3,9-dimethylidene-dodecahydronaphtho[1,2-b]furan-2-one | C15 H20 O3 | 230.13056 | 231.13783 | 16.647 | [M+H]+1 | 728929749.3 |
| Bis(2-ethylhexyl)adipate | C22 H42 O4 | 370.30789 | 371.31519 | 21.231 | [M+H]+1 | 77006600.34 |
| Asperulosidic acid | C18 H24 O12 | 449.15328 | 450.16055 | 9.172 | [M+H]+1 | 110130844.3 |
| 3-(propan-2-yl)-octahydropyrrolo[1,2-a]pyrazine-1,4-dione | C10 H16 N2 O2 | 196.12126 | 197.12856 | 9.124 | [M+H]+1 | 102353787.4 |
| Adenine | C5 H5 N5 | 118.02799 | 136.06181 | 4.504 | [M+NH4]+1 | 890319939.1 |
| 4-Hydroxybenzaldehyde | C7 H6 O2 | 122.0355 | 121.02819 | 12.057 | [M-H]-1 | 70939784.8 |
| Nobiletin | C21 H22 O8 | 402.1313 | 403.13858 | 17.61 | [M+H]+1 | 271798992.9 |
| 1-Linoleoyl glycerol | C21 H38 O4 | 354.27649 | 377.26572 | 21.334 | [M+Na]+1 | 127052744.1 |
| Ageratriol | C15 H24 O3 | 234.16191 | 235.16919 | 15.291 | [M+H]+1 | 2028925453 |
| Nicotinamide | C6 H6 N2 O | 122.04832 | 123.0556 | 2.29 | [M+H]+1 | 538420679.5 |
| (2E)-3-(3,4-dihydroxy-2-methoxyphenyl)-1-(4-hydroxyphenyl)prop-2-en-1-one | C16 H14 O5 | 286.08404 | 287.09109 | 13.847 | [M+H]+1 | 362486301.9 |
| Stearic acid | C18 H36 O2 | 284.27159 | 283.26431 | 23.776 | [M-H]-1 | 51429905.07 |
| 7-Methyl-3-methylene-6-(3-oxobutyl)-3,3a,4,7,8,8a-hexahydro-2H-cyclohepta[b]furan-2-one | C15 H20 O3 | 248.14103 | 231.13774 | 14.931 | [M+H-H2O]+1 | 2796747269 |
| (2S,3R,4S,5S,6R)-2-{4-[(1S,3aR,4S,6aR)-4-(4-hydroxy-3,5-dimethoxyphenyl)-hexahydrofuro[3,4-c]furan-1-yl]-2,6-dimethoxyphenoxy}-6-(hydroxymethyl)oxane-3,4,5-triol | C28 H36 O13 | 597.24199 | 598.24927 | 11.13 | [M+H]+1 | 41493709.57 |
| Neochlorogenic acid | C16 H18 O9 | 354.095 | 353.08777 | 8.063 | [M-H]-1 | 576370138 |
| Genistein | C15 H10 O5 | 270.05281 | 269.04553 | 18.575 | [M-H]-1 | 315986288.9 |
| 18-β-Glycyrrhetinic acid | C30 H46 O4 | 470.33912 | 453.33582 | 18.357 | [M+H-H2O]+1 | 2874841316 |
| D-(+)-Glucose | C6 H12 O6 | 197.08997 | 198.09724 | 1.336 | [M+H]+1 | 762519959.6 |
| 5-hydroxy-2-(4-hydroxyphenyl)-6-methoxy-7-{[(2S,3R,4S,5S,6R)-3,4,5-trihydroxy-6-(hydroxymethyl)oxan-2-yl]oxy}-4H-chromen-4-one | C22 H22 O11 | 462.11625 | 463.12335 | 13.432 | [M+H]+1 | 85360157.68 |
| Tridemorph | C19 H39 N O | 297.30324 | 298.31052 | 22.303 | [M+H]+1 | 53872705.48 |
| (4S)-4-hydroxy-3,5,5-trimethyl-4-[(1E)-3-{[(2R,3R,4S,5S,6R)-3,4,5-trihydroxy-6-(hydroxymethyl)oxan-2-yl]oxy}but-1-en-1-yl]cyclohex-2-en-1-one | C19 H30 O8 | 386.1938 | 387.20102 | 10.28 | [M+H]+1 | 182469808.5 |
| 2-Methylbenzoic acid | C8 H8 O2 | 136.05118 | 135.0439 | 10.032 | [M-H]-1 | 131260163.1 |
| Methyl 3-(3-methylbut-2-enyl)-1,4-bis[[3,4,5-trihydroxy-6-(hydroxymethyl)oxan-2-yl]oxy]naphthalene-2-carboxylate | C29 H38 O14 | 610.22569 | 628.2594 | 12.214 | [M+NH4]+1 | 122232705 |
| (3aR,4aS,5R,6S,8S,9aR)-5,6-dihydroxy-4a,8-dimethyl-3-methylidene-dodecahydroazuleno[6,5-b]furan-2-one | C15 H22 O4 | 248.14107 | 249.14835 | 15.659 | [M+H]+1 | 414707342 |
| 3-Methylglutaric acid | C6 H10 O4 | 146.05713 | 145.04953 | 7.797 | [M-H]-1 | 18471436.81 |
| Didecyl phthalate | C28 H46 O4 | 446.33961 | 447.34689 | 23.357 | [M+H]+1 | 73680319.09 |
| Astragalin | C21 H20 O11 | 448.10067 | 447.09348 | 13.464 | [M-H]-1 | 47734652.89 |
| 5,7-dihydroxy-2-(4-hydroxyphenyl)-6-[(2S,3R,4R,5S,6R)-3,4,5-trihydroxy-6-(hydroxymethyl)oxan-2-yl]-8-[(2S,3R,4R,5R,6S)-3,4,5-trihydroxy-6-methyloxan-2-yl]-4H-chromen-4-one | C27 H30 O14 | 578.16313 | 579.17041 | 12.549 | [M+H]+1 | 114936981.3 |
| (3aS,5aR,6R,9aS,9bS)-6-hydroxy-5a-methyl-3,9-dimethylidene-dodecahydronaphtho[1,2-b]furan-2-one | C15 H20 O3 | 248.14098 | 231.1377 | 14.359 | [M+H-H2O]+1 | 1950227954 |
| 2-(hydroxymethyl)-6-{5-[3-(hydroxymethyl)-5-(3-hydroxypropyl)-7-methoxy-2,3-dihydro-1-benzofuran-2-yl]-2-methoxyphenoxy}oxane-3,4,5-triol | C26 H34 O11 | 539.23693 | 540.2442 | 12.08 | [M+H]+1 | 79389163.4 |
| (±)13-HpODE | C18 H32 O4 | 294.21973 | 295.22699 | 19.638 | [M+H]+1 | 100438160.6 |
| 2-Hydroxy-1,4-naphthoquinone | C10 H6 O3 | 174.03079 | 173.02351 | 14.548 | [M-H]-1 | 22506527.75 |
| Scopoletin | C10 H8 O4 | 192.04225 | 193.04959 | 11.326 | [M+H]+1 | 279023618.6 |
| Nootkatone | C15 H22 O | 218.1671 | 219.17438 | 17.74 | [M+H]+1 | 221028502.1 |
| Daidzein | C15 H10 O4 | 254.05783 | 255.06506 | 14.523 | [M+H]+1 | 109765226.2 |
| Asparagine | C4 H8 N2 O3 | 132.05356 | 133.06084 | 1.29 | [M+H]+1 | 3861862197 |
| Pyrogallol | C6 H6 O3 | 126.03047 | 125.02319 | 5.108 | [M-H]-1 | 89344062.54 |
| 2-(2-amino-3-methylbutanamido)-3-phenylpropanoic acid | C14 H20 N2 O3 | 264.14734 | 265.1546 | 8.06 | [M+H]+1 | 344590596 |
| 1,2,3-cyclopropanetricarboxylic acid | C6 H6 O6 | 174.01552 | 173.00824 | 4.694 | [M-H]-1 | 976706807 |
| 2-(6-Hydroxyhexyl)-3-methylenesuccinic acid | C11 H18 O5 | 230.11508 | 229.1078 | 14.119 | [M-H]-1 | 84405277.86 |
| Naringin | C27 H32 O14 | 580.17871 | 579.17151 | 12.196 | [M-H]-1 | 2287029898 |
| Tridemorph | C19 H39 N O | 297.3031 | 298.31036 | 23.618 | [M+H]+1 | 173695604.5 |
| (±)13-HpODE | C18 H32 O4 | 294.21944 | 295.22672 | 17.257 | [M+H]+1 | 224079641.4 |
| α-Aspartylphenylalanine | C13 H16 N2 O5 | 280.10597 | 281.11313 | 7.166 | [M+H]+1 | 32728347.04 |
| 2-Methylbenzoic acid | C8 H8 O2 | 136.05112 | 135.04384 | 11.678 | [M-H]-1 | 48756261.61 |
| Homogentisic acid | C8 H8 O4 | 168.04138 | 167.0341 | 6.478 | [M-H]-1 | 26528495.38 |
| Quercetin | C15 H10 O7 | 302.04281 | 301.03561 | 14.666 | [M-H]-1 | 482700103.1 |
| Dodecanedioic acid | C12 H22 O4 | 170.13007 | 229.14407 | 16.399 | [M-H+HAc]-1 | 35912960.27 |
| Bis(3,5,5-trimethylhexyl) phthalate | C26 H42 O4 | 418.30782 | 419.31509 | 24.037 | [M+H]+1 | 233177428.3 |
| 2,3-dihydroxypropyl 12-methyltridecanoate | C17 H34 O4 | 302.24542 | 325.23456 | 20.536 | [M+Na]+1 | 199184058.4 |
| DL-Arginine | C6 H14 N4 O2 | 174.11152 | 175.11887 | 1.175 | [M+H]+1 | 15906181381 |
| (3aR,4aS,5R,6S,8S,9aR)-5,6-dihydroxy-4a,8-dimethyl-3-methylidene-dodecahydroazuleno[6,5-b]furan-2-one | C15 H22 O4 | 248.14104 | 249.14828 | 15.851 | [M+H]+1 | 562509468.7 |
| Schaftoside | C26 H28 O14 | 564.1476 | 565.15472 | 11.387 | [M+H]+1 | 97471714.91 |
| Genistin | C21 H20 O10 | 432.10567 | 433.11295 | 15.062 | [M+H]+1 | 117251117.9 |
| 16-Hydroxyhexadecanoic acid | C16 H32 O3 | 272.23515 | 271.22787 | 22.09 | [M-H]-1 | 58924436.13 |
| Prolylleucine | C11 H20 N2 O3 | 228.14769 | 229.15497 | 5.614 | [M+H]+1 | 59333509.2 |
| Avobenzone | C20 H22 O3 | 310.15666 | 311.16394 | 20.863 | [M+H]+1 | 125642758.7 |
| 3-Hydroxybenzyl alcohol | C7 H8 O2 | 124.05118 | 123.0439 | 7.62 | [M-H]-1 | 20917232.94 |
| Sibiricose A3 | C19 H26 O13 | 402.11626 | 401.10889 | 9.054 | [M-H]-1 | 18268489.36 |
| Gentisic acid | C7 H6 O4 | 154.02554 | 153.01825 | 7.145 | [M-H]-1 | 399221664.6 |
| 5,7-dihydroxy-2-(4-hydroxy-3-{[(2S,3R,4S,5S,6R)-3,4,5-trihydroxy-6-(hydroxymethyl)oxan-2-yl]oxy}phenyl)-3-methoxy-4H-chromen-4-one | C22 H22 O12 | 478.11119 | 479.11847 | 12.865 | [M+H]+1 | 266043549.4 |
| Dodecamethylcyclohexasiloxane | C12 H36 O6 Si6 | 444.11233 | 462.14618 | 24.244 | [M+NH4]+1 | 170857939 |
| (2R)-7-Methoxy-3-oxo-3,4-dihydro-2H-1,4-benzoxazin-2-yl β-D-glucopyranoside | C15 H19 N O9 | 379.08765 | 380.09494 | 1.149 | [M+H]+1 | 34968356.62 |
| (+/-)9-HpODE | C18 H32 O4 | 312.23017 | 311.2229 | 16.989 | [M-H]-1 | 131025580.6 |
| Tangeritin | C20 H20 O7 | 372.12041 | 373.12769 | 16.129 | [M+H]+1 | 749321073.1 |
| (3aR,8R,8aR,9aR)-8-Hydroxy-8a-methyl-3,5-bis(methylene)decahydronaphtho[2,3-b]furan-2(3H)-one | C15 H20 O3 | 248.14107 | 231.13779 | 13.184 | [M+H-H2O]+1 | 1490607709 |
| Nobiletin | C21 H22 O8 | 402.1312 | 403.13849 | 16.179 | [M+H]+1 | 181567167.5 |
| Corymboside | C26 H28 O14 | 532.12148 | 565.15497 | 11.555 | [M+H+MeOH]+1 | 100226445.6 |
| DL-Arginine | C6 H14 N4 O2 | 174.11174 | 175.11902 | 1.539 | [M+H]+1 | 592901957.1 |
| Nobiletin | C21 H22 O8 | 402.13094 | 403.13821 | 16.297 | [M+H]+1 | 329522352.9 |
| Phenylacetaldehyde | C8 H8 O | 120.05606 | 119.04878 | 11.301 | [M-H]-1 | 35412860.31 |
| 12-oxo Phytodienoic Acid | C18 H28 O3 | 274.19307 | 275.20038 | 15.828 | [M+H]+1 | 382879192.6 |
| (1R,2R,6R,9R)-2,11,11-trimethyl-3-oxotricyclo[4.3.2.0Âa,âµ]undecane-9-carboxylic acid | C15 H22 O3 | 232.14624 | 233.15352 | 14.626 | [M+H]+1 | 977826600.3 |
| 2-(acetylamino)-3-(1H-indol-3-yl)propanoic acid | C13 H14 N2 O3 | 246.1006 | 556.21753 | 11.588 | [2M+ACN+Na]+1 | 86803604.64 |
| 4,5-Dicaffeoylquinic acid | C25 H24 O12 | 516.12666 | 515.11938 | 13.288 | [M-H]-1 | 1505974855 |
| 3,5-di-tert-Butyl-4-hydroxybenzaldehyde | C15 H22 O2 | 234.16193 | 235.1692 | 17.792 | [M+H]+1 | 245314928.6 |
| (3aR,4aS,5R,7aS,8S,9aR)-5-Hydroxy-4a,8-dimethyl-3-methyleneoctahydroazuleno[6,5-b]furan-2,6(3H,4H)-dione | C15 H20 O4 | 264.13625 | 265.14352 | 10.228 | [M+H]+1 | 84919832.65 |
| Miquelianin | C21 H18 O13 | 478.07472 | 479.08197 | 12.477 | [M+H]+1 | 161706846 |
| 1-(Carboxymethyl)cyclohexanecarboxylic acid | C9 H14 O4 | 186.08844 | 185.08116 | 10.896 | [M-H]-1 | 42193072.28 |
| (3aR,5S,7S,8aR,9aR)-7-hydroxy-5,8a-dimethyl-3-methylidene-2H,3H,3aH,5H,6H,7H,8H,8aH,9H,9aH-naphtho[2,3-b]furan-2-one | C15 H20 O3 | 230.13047 | 231.13774 | 13.761 | [M+H]+1 | 1100936173 |
| (1R,2R,6R,9R)-2,11,11-trimethyl-3-oxotricyclo[4.3.2.0Âa,âµ]undecane-9-carboxylic acid | C15 H22 O3 | 232.14626 | 233.15353 | 17.355 | [M+H]+1 | 686028494.3 |
| Osajin | C25 H24 O5 | 404.16223 | 405.16949 | 20.412 | [M+H]+1 | 43302324.46 |
| DL-Stachydrine | C7 H13 N O2 | 143.09461 | 144.10188 | 1.478 | [M+H]+1 | 5378318085 |
| 5,7-Dihydroxy-2-(4-hydroxyphenyl)-6,8-bis[3,4,5-trihydroxy-6-(hydroxymethyl)tetrahydro-2H-pyran-2-yl]-4H-chromen-4-one | C27 H30 O15 | 594.15825 | 595.16553 | 10.785 | [M+H]+1 | 274981311.8 |
| 1,4-dihydroxy-1,4-dimethyl-7-(propan-2-ylidene)-decahydroazulen-6-one | C15 H24 O3 | 234.16176 | 235.16901 | 15.811 | [M+H]+1 | 1166182978 |
| Emodin | C15 H10 O5 | 270.05257 | 271.05984 | 16.701 | [M+H]+1 | 583074107.1 |
| 6-Methoxyquinoline | C10 H9 N O | 159.06854 | 160.07581 | 3.834 | [M+H]+1 | 1184682958 |
| Alizarin | C14 H8 O4 | 240.04196 | 239.03468 | 16.163 | [M-H]-1 | 62964381.35 |
| 4-Methylumbelliferone | C10 H8 O3 | 176.04629 | 175.03902 | 10.378 | [M-H]-1 | 72882130.63 |
| Phthalic acid | C8 H6 O4 | 166.02675 | 167.03403 | 9.667 | [M+H]+1 | 50611185.77 |
| (15Z)-9,12,13-Trihydroxy-15-octadecenoic acid | C18 H34 O5 | 330.24041 | 329.23312 | 16.267 | [M-H]-1 | 7752812144 |
| Lariciresinol 4-O-glucoside | C26 H34 O11 | 522.20966 | 567.20782 | 11.699 | [M+FA-H]-1 | 174286068.9 |
| 4-[(1S,4R)-4-(4-Hydroxy-3,5-dimethoxyphenyl)tetrahydro-1H,3H-furo[3,4-c]furan-1-yl]-2,6-dimethoxyphenyl 2-O-[(2S,3R,4R)-3,4-dihydroxy-4-(hydroxymethyl)tetrahydro-2-furanyl]-β-D-glucopyranoside | C33 H44 O17 | 712.25788 | 757.25623 | 12.001 | [M+FA-H]-1 | 159441509.4 |
| (+/-)12(13)-DiHOME | C18 H34 O4 | 296.23507 | 279.23181 | 19.918 | [M+H-H2O]+1 | 154035288.4 |
| 3-Phenyllactic acid | C9 H10 O3 | 120.0565 | 165.0547 | 11.061 | [M+FA-H]-1 | 224762365.5 |
| 8-hydroxy-11-(hydroxymethyl)-1,5,11-trimethyltricyclo[6.2.1.0Â?,â¶]undec-2-en-9-one | C15 H22 O3 | 250.15666 | 251.16393 | 16.128 | [M+H]+1 | 831140944 |
| Luteolin | C15 H10 O6 | 286.04777 | 285.04065 | 14.976 | [M-H]-1 | 462693995.8 |
| Cuminaldehyde | C10 H12 O | 148.08878 | 149.09605 | 17.057 | [M+H]+1 | 153132189.6 |
| Emodin | C15 H10 O5 | 288.06335 | 271.06006 | 15.066 | [M+H-H2O]+1 | 509812174.9 |
| (1R,3S,4S,5R,7R)-4-(3-hydroxybutyl)-5-methyl-10-methylidene-8-oxatricyclo[5.3.0.0Âl,âµ]decan-9-one | C15 H22 O3 | 250.15686 | 251.16414 | 12.143 | [M+H]+1 | 195269214.4 |
| Hispidulin | C16 H12 O6 | 300.06333 | 301.07053 | 15.727 | [M+H]+1 | 215767905.8 |
| Guanine | C5 H5 N5 O | 151.04961 | 152.05688 | 5.577 | [M+H]+1 | 99176556.47 |
| Lupeol | C30 H50 O | 426.38565 | 427.39297 | 23.715 | [M+H]+1 | 222278543.2 |
| 12-Oxo phytodienoic acid | C18 H28 O3 | 292.20375 | 293.21103 | 17.11 | [M+H]+1 | 574628218 |
| CMPF | C12 H16 O5 | 240.09949 | 239.09221 | 11.326 | [M-H]-1 | 60891733.71 |
| Hispidulin | C16 H12 O6 | 300.06355 | 299.05627 | 13.819 | [M-H]-1 | 51873288.52 |
| 5,7-dihydroxy-2-(3-hydroxy-4-methoxyphenyl)-3,6-dimethoxy-4H-chromen-4-one | C18 H16 O8 | 360.08433 | 361.09158 | 15.106 | [M+H]+1 | 412268602.3 |
| Apocynin | C9 H10 O3 | 166.06305 | 167.07033 | 7.527 | [M+H]+1 | 210473210.8 |
| N-(3-Chloro-4-morpholinophenyl)-6-oxo-1,4,5,6-tetrahydro-3-pyridazinecarboxamide | C15 H17 Cl N4 O3 | 336.09977 | 337.10693 | 17.343 | [M+H]+1 | 47904736.1 |
| 2-Hydroxyhippuric acid | C9 H9 N O4 | 235.04578 | 218.04248 | 1.094 | [M+H-H2O]+1 | 254516525.7 |
| (3aS,5aS,9bR)-5a,9-dimethyl-3-methylidene-2H,3H,3aH,4H,5H,5aH,6H,7H,8H,9bH-naphtho[1,2-b]furan-2,5-dione | C15 H18 O3 | 228.11498 | 229.12225 | 12.506 | [M+H]+1 | 144806205.1 |
| (3aR,7aS,8S,9aR)-5,8-dimethyl-3-methylidene-2H,3H,3aH,4H,6H,7H,7aH,8H,9H,9aH-azuleno[6,5-b]furan-2,6-dione | C15 H18 O3 | 228.11496 | 229.12225 | 13.537 | [M+H]+1 | 213257547.3 |
| (±)-Abscisic acid | C15 H20 O4 | 264.13603 | 263.12875 | 16.346 | [M-H]-1 | 26393169.48 |
| Oxomemazine | C18 H22 N2 O2 S | 330.14391 | 331.15118 | 14.852 | [M+H]+1 | 120976996.9 |
| Asiatic acid | C30 H48 O5 | 488.35052 | 471.34744 | 17.88 | [M+H-H2O]+1 | 20427202.03 |
| 3-[(4-hydroxyphenyl)methyl]-octahydropyrrolo[1,2-a]pyrazine-1,4-dione | C14 H16 N2 O3 | 243.08969 | 261.12354 | 8.762 | [M+NH4]+1 | 35797668.48 |
| (2E)-3-(4-{[(2S,3R,4S,5S,6R)-3,4,5-trihydroxy-6-(hydroxymethyl)oxan-2-yl]oxy}phenyl)prop-2-enoic acid | C15 H18 O8 | 343.12654 | 344.13382 | 11.286 | [M+H]+1 | 41967522.53 |
| Scoparone | C11 H10 O4 | 206.05792 | 207.0652 | 12.305 | [M+H]+1 | 209680361.4 |
| Oleic acid | C18 H34 O2 | 282.25586 | 281.2486 | 22.901 | [M-H]-1 | 46815027.48 |
| 4,5-Dicaffeoylquinic acid | C25 H24 O12 | 258.06321 | 515.11914 | 12.382 | [2M-H]-1 | 2312298255 |
| Xanthine | C5 H4 N4 O2 | 152.03239 | 151.02512 | 3.53 | [M-H]-1 | 39539697.77 |
| 2-Phenoxypropanoic acid | C9 H10 O3 | 166.06183 | 165.05455 | 9.085 | [M-H]-1 | 5031914572 |
| tert-Butyl N-[1-(aminocarbonyl)-3-methylbutyl]carbamate | C11 H22 N2 O3 | 230.16317 | 231.17049 | 5.732 | [M+H]+1 | 54635093.73 |
| 12-oxo Phytodienoic Acid | C18 H28 O3 | 292.20371 | 293.21097 | 18.595 | [M+H]+1 | 339441036.4 |
| Meptazinol | C15 H23 N O | 233.17809 | 234.18536 | 9.503 | [M+H]+1 | 138067665.8 |
| Meptazinol | C15 H23 N O | 233.17803 | 234.1853 | 9.308 | [M+H]+1 | 75482271.09 |
| Argininosuccinic acid | C10 H18 N4 O6 | 134.07024 | 291.12979 | 1.3 | [2M+Na]+1 | 145383164.4 |
| DL-Tryptophan | C11 H12 N2 O2 | 204.08926 | 203.08199 | 7.458 | [M-H]-1 | 30802901.48 |
| Tolycaine | C15 H22 N2 O3 | 278.16311 | 279.17038 | 9.426 | [M+H]+1 | 49420956.53 |
| Palmitoyl ethanolamide | C18 H37 N O2 | 299.28221 | 300.28949 | 21.332 | [M+H]+1 | 88205935.45 |
| Cuminaldehyde | C10 H12 O | 148.08882 | 149.0961 | 17.478 | [M+H]+1 | 126916115.5 |
| Limonin | C26 H30 O8 | 470.19417 | 471.20142 | 11.908 | [M+H]+1 | 37563328.5 |
| Ethyl levulinate | C7 H12 O3 | 144.07887 | 145.08618 | 6.802 | [M+H]+1 | 15895442.34 |
| 13(S)-HOTrE | C18 H30 O3 | 294.21949 | 293.21222 | 18.756 | [M-H]-1 | 282887254.5 |
| Meperidine | C15 H21 N O2 | 215.13113 | 248.16461 | 8.245 | [M+H+MeOH]+1 | 82931459.03 |
| Gentisic acid | C7 H6 O4 | 154.02543 | 153.01816 | 12.679 | [M-H]-1 | 162828079.4 |
| 2,5-di-tert-Butylhydroquinone | C14 H22 O2 | 222.1615 | 221.15422 | 15.489 | [M-H]-1 | 41907445 |
| 3-[4-methyl-1-(2-methylpropanoyl)-3-oxocyclohexyl]butanoic acid | C15 H24 O4 | 290.15148 | 291.15875 | 14.818 | [M+H]+1 | 796424297.1 |
| Glycitein | C16 H12 O5 | 284.06833 | 283.0611 | 16.084 | [M-H]-1 | 49236986.78 |
| Genistein | C15 H10 O5 | 270.05302 | 269.04575 | 14.845 | [M-H]-1 | 67643414.49 |
| 2-Furoic acid | C5 H4 O3 | 130.02527 | 111.00739 | 2.692 | [M-H-H2O]-1 | 382319072.3 |
| 2-[(2R,4aR,8R,8aR)-8-hydroxy-4a,8-dimethyl-decahydronaphthalen-2-yl]prop-2-enoic acid | C15 H24 O3 | 308.13745 | 291.13416 | 7.084 | [M+H-H2O]+1 | 61834296.84 |
| (3aR,4aS,5R,7aS,8S,9aR)-5-Hydroxy-4a,8-dimethyl-3-methyleneoctahydroazuleno[6,5-b]furan-2,6(3H,4H)-dione | C15 H20 O4 | 264.13584 | 265.1431 | 11.761 | [M+H]+1 | 222813369.8 |
| N-(6-methoxypyridin-3-yl)thiophene-2-carboxamide | C11 H10 N2 O2 S | 234.04939 | 235.05667 | 1.123 | [M+H]+1 | 226694933.7 |
| 3-tert-Butyladipic acid | C10 H18 O4 | 202.12007 | 201.11259 | 14.496 | [M-H]-1 | 248405522.1 |
| 3-Methoxy-5,7,3',4'-tetrahydroxy-flavone | C16 H12 O7 | 316.05835 | 315.05124 | 14.982 | [M-H]-1 | 361698939.7 |
| 4-Indolecarbaldehyde | C9 H7 N O | 145.05278 | 146.06006 | 7.201 | [M+H]+1 | 172459117.2 |
| DL-Tryptophan | C11 H12 N2 O2 | 408.17491 | 409.18219 | 7.031 | [M+H]+1 | 2006056.765 |
| (4S)-4-[(3aS,4S,7aR)-4-Hydroxy-6-methyl-3-methylene-2-oxo-2,3,3a,4,7,7a-hexahydro-1-benzofuran-5-yl]pentyl acetate | C17 H24 O5 | 308.16232 | 309.16965 | 15.139 | [M+H]+1 | 121942332.3 |
| 5,10,15-trimethyl-4,9,13-trioxatetracyclo[10.3.0.0Âl,âµ.0â¸,Âaâ°]pentadec-1(15)-en-14-one | C15 H20 O4 | 264.13616 | 247.13286 | 13.557 | [M+H-H2O]+1 | 430102903.8 |
| (3beta,5xi,9xi,22beta)-22,24-Dihydroxyolean-12-en-3-yl 6-deoxy-alpha-L-mannopyranosyl-(1-2)-beta-D-galactopyranuronosyl-(1-2)-beta-D-glucopyranosiduronic acid | C48 H76 O19 | 956.49822 | 955.49109 | 19.076 | [M-H]-1 | 56041378.4 |
| Thymidine | C10 H14 N2 O5 | 242.09415 | 243.1015 | 17.497 | [M+H]+1 | 72208713.41 |
| 4-(2,6-dimethylphenyl)-5-(7-oxabicyclo[2.2.1]hept-2-yl)-2,4-dihydro-3H-1,2,4-triazole-3-thione | C16 H19 N3 O S | 301.12753 | 302.13483 | 2.162 | [M+H]+1 | 102771860 |
| (11E,15Z)-9,10,13-trihydroxyoctadeca-11,15-dienoic acid | C18 H32 O5 | 345.25109 | 346.25836 | 15.834 | [M+H]+1 | 534637046.8 |
| N-[1-(4-methoxy-2-oxo-2H-pyran-6-yl)-2-methylbutyl]acetamide | C13 H19 N O4 | 275.11581 | 276.12311 | 8.802 | [M+H]+1 | 62617607.22 |
| Vanillin | C8 H8 O3 | 152.04742 | 153.05467 | 10.39 | [M+H]+1 | 166757912.6 |
| (15Z)-9,12,13-Trihydroxy-15-octadecenoic acid | C18 H34 O5 | 330.24064 | 329.23337 | 17.207 | [M-H]-1 | 378576750.9 |
| 2-(3,4-Dihydroxyphenyl)-5-hydroxy-4-oxo-4H-chromen-7-yl 6-O-(6-deoxy-alpha-L-mannopyranosyl)-beta-D-glucopyranoside | C27 H30 O15 | 594.15847 | 595.16565 | 12.457 | [M+H]+1 | 52460123.23 |
| 2-Isopropyl-5-thieno[3,2-b]thiophen-2-yl-1,3,4-oxadiazole | C11 H10 N2 O S2 | 250.02329 | 251.03056 | 1.129 | [M+H]+1 | 694256110.8 |
| tert-Butyl N-[1-(aminocarbonyl)-3-methylbutyl]carbamate | C11 H22 N2 O3 | 230.16307 | 231.17038 | 6.31 | [M+H]+1 | 54103115.07 |
| 5,10,15-trimethyl-4,9,13-trioxatetracyclo[10.3.0.0Âl,âµ.0â¸,Âaâ°]pentadec-1(15)-en-14-one | C15 H20 O4 | 246.12546 | 247.13274 | 11.649 | [M+H]+1 | 254517708 |
| Cafestol | C20 H28 O3 | 316.20128 | 317.20856 | 18.77 | [M+H]+1 | 99030460.73 |
| Adenine | C5 H5 N5 | 135.05327 | 134.04599 | 4.499 | [M-H]-1 | 170374594.9 |
| Palmitic Acid | C16 H32 O2 | 273.26637 | 274.27365 | 14.834 | [M+H]+1 | 2006958577 |
| 4-[(1S,3aR,4S,6aR)-4-(4-hydroxy-3-methoxyphenyl)-hexahydrofuro[3,4-c]furan-1-yl]-2-methoxyphenol | C20 H22 O6 | 358.14144 | 341.13815 | 12.814 | [M+H-H2O]+1 | 163382990.1 |
| Bis(7-methyloctyl) adipate | C24 H46 O4 | 398.33932 | 399.34659 | 25.276 | [M+H]+1 | 84440471.08 |
| (3β,5ξ,9ξ)-3,23-Dihydroxy-1-oxoolean-12-en-28-oic acid | C30 H46 O5 | 486.33461 | 469.3313 | 17.672 | [M+H-H2O]+1 | 50510917.29 |
| 2-(4-Hydroxyphenyl)ethyl 6-O-[(2R,3R,4R)-3,4-dihydroxy-4-(hydroxymethyl)tetrahydro-2-furanyl]-beta-D-glucopyranoside | C19 H28 O11 | 432.16332 | 431.15598 | 8.908 | [M-H]-1 | 21477681.81 |
| 2-(14,15-Epoxyeicosatrienoyl) glycerol | C23 H38 O5 | 394.26964 | 395.27692 | 19.644 | [M+H]+1 | 82152920.5 |
| 3-(3,4-dihydroxyphenyl)propanoic acid | C9 H10 O4 | 164.04759 | 182.08142 | 2.944 | [M+NH4]+1 | 1458013365 |
| Ornithine | C5 H12 N2 O2 | 132.08864 | 131.08136 | 1.136 | [M-H]-1 | 293274678.4 |
| 7-Hydroxycoumarine | C9 H6 O3 | 162.03166 | 163.03893 | 13.149 | [M+H]+1 | 598999400.1 |
| 6-Deoxy-α-L-mannopyranosyl-(1->3)-[β-D-glucopyranosyl-(1->6)]-1-O-[3,27-dihydroxy-27,28-dioxolup-20(29)-en-28-yl]-β-D-glucopyranose | C48 H76 O19 | 956.49788 | 955.4906 | 20.283 | [M-H]-1 | 57095591.5 |
| Argininosuccinic acid | C10 H18 N4 O6 | 273.09587 | 291.12967 | 1.436 | [M+NH4]+1 | 165139303.5 |
| 2-Amino-1,3,4-octadecanetriol | C18 H39 N O3 | 317.29268 | 318.29996 | 14.889 | [M+H]+1 | 1251876908 |
| 10-Nitrolinoleate | C18 H31 N O4 | 307.21459 | 308.22186 | 13.012 | [M+H]+1 | 96023066.89 |
| Estriol 17-sulfate | C18 H24 O6 S | 368.12559 | 367.11832 | 16.258 | [M-H]-1 | 171511702.2 |
| (12Z)-9,10,11-trihydroxyoctadec-12-enoic acid | C18 H34 O5 | 352.22228 | 353.22955 | 16.721 | [M+H]+1 | 186693642.2 |
| 1,9b-Dihydroxy-6,6,9a-trimethyl-5,5a,6,7,8,9,9a,9b-octahydronaphtho[1,2-c]furan-3(1H)-one | C15 H22 O4 | 288.13216 | 289.13943 | 4.243 | [M+H]+1 | 266072887.7 |
| 7-(3,4-dihydroxyphenyl)-5-hydroxy-1-(4-hydroxyphenyl)heptan-3-one | C19 H22 O5 | 352.13082 | 353.13809 | 16.79 | [M+H]+1 | 316359394 |
| 4-(methoxymethyl)-1,3-dimethyl-1H-pyrazolo[3,4-b]pyridin-6-ol | C10 H13 N3 O2 | 207.10086 | 208.10814 | 7.583 | [M+H]+1 | 58303289.22 |
| Tolycaine | C15 H22 N2 O3 | 237.13662 | 279.17047 | 9.961 | [M+ACN+H]+1 | 54372965.65 |
| 10-HDA | C10 H18 O3 | 168.11508 | 169.12236 | 10.812 | [M+H]+1 | 121221114.5 |
| N-({(2R,4S,5R)-5-[3-(4-Fluorophenyl)-1-methyl-1H-pyrazol-5-yl]-1-azabicyclo[2.2.2]oct-2-yl}methyl)-4-methoxybenzamide | C26 H29 F N4 O2 | 494.23662 | 493.22934 | 8.098 | [M-H]-1 | 15642057.35 |
| Phenacetin | C10 H13 N O2 | 179.09471 | 180.10199 | 7.799 | [M+H]+1 | 113001696.8 |
| (1,3-Phenylenedioxy)diacetic acid | C10 H10 O6 | 226.04759 | 225.04012 | 7.495 | [M-H]-1 | 22383092.58 |
| Uridine | C9 H12 N2 O6 | 244.06957 | 243.06207 | 3.511 | [M-H]-1 | 507175624.3 |
| 4-(2,6-dimethylphenyl)-5-(7-oxabicyclo[2.2.1]hept-2-yl)-2,4-dihydro-3H-1,2,4-triazole-3-thione | C16 H19 N3 O S | 301.12731 | 302.13458 | 1.474 | [M+H]+1 | 162552629.9 |
| 3,5-Dihydroxy-2-(4-hydroxyphenyl)-4-oxo-3,4-dihydro-2H-chromen-7-yl hexopyranoside | C21 H22 O11 | 450.11638 | 449.1091 | 10.142 | [M-H]-1 | 32014089.13 |
| (1R,3S,4S,5R,7R)-4-(3-hydroxybutyl)-5-methyl-10-methylidene-8-oxatricyclo[5.3.0.0Âl,âµ]decan-9-one | C15 H22 O3 | 250.15685 | 251.16412 | 11.17 | [M+H]+1 | 91176100.03 |
| 1-(Carboxymethyl)cyclohexanecarboxylic acid | C9 H14 O4 | 186.08938 | 204.1232 | 10.022 | [M+NH4]+1 | 67167103.41 |
| (2E)-3-(4-methoxy-2-{[(2S,3R,4S,5S,6R)-3,4,5-trihydroxy-6-(hydroxymethyl)oxan-2-yl]oxy}phenyl)prop-2-enoic acid | C16 H20 O9 | 373.13731 | 374.14459 | 9.292 | [M+H]+1 | 23871097.27 |
| Estrone sulfate | C18 H22 O5 S | 350.11514 | 351.12238 | 17.526 | [M+H]+1 | 86907396.24 |
| (±)9-HpODE | C18 H32 O4 | 312.2303 | 311.22302 | 19.639 | [M-H]-1 | 31776119.51 |
| (-)-Caryophyllene oxide | C15 H24 O | 220.18277 | 203.17955 | 13.401 | [M+H-H2O]+1 | 27041339.77 |
| 2-(2,6-dimethoxyphenyl)-5,6-dimethoxy-4H-chromen-4-one | C19 H18 O6 | 342.10997 | 343.11725 | 16.553 | [M+H]+1 | 795621212 |
| (3aR,4S,7aR)-5-[(2S)-5-Hydroxy-2-pentanyl]-6-methyl-3-methylene-2-oxo-2,3,3a,4,7,7a-hexahydro-1-benzofuran-4-yl 2-methylpropanoate | C19 H28 O5 | 353.21968 | 354.22696 | 15.912 | [M+H]+1 | 173727559.2 |
| 3-(1,1,2,3,3,3-hexafluoropropyl)adamantane-1-carboxylic acid | C14 H16 F6 O2 | 330.09843 | 329.09116 | 12.293 | [M-H]-1 | 108382480.9 |
| D-Raffinose | C18 H32 O16 | 504.16919 | 522.20306 | 1.876 | [M+NH4]+1 | 518781298.5 |
| (-)-Caryophyllene oxide | C15 H24 O | 220.18264 | 203.17943 | 15.939 | [M+H-H2O]+1 | 121291587.2 |
| Caffeic acid | C9 H8 O4 | 180.04136 | 179.03409 | 12.003 | [M-H]-1 | 67898112.18 |
| Syringic acid | C9 H10 O5 | 198.05303 | 199.0603 | 8.304 | [M+H]+1 | 33981108.58 |
| trans,trans-Muconic acid | C6 H6 O4 | 142.0255 | 141.01822 | 6.169 | [M-H]-1 | 39118786.94 |
| MPBP | C15 H21 N O | 249.17298 | 232.16969 | 8.903 | [M+H-H2O]+1 | 124049674.2 |
| Guanosine monophosphate (GMP) | C10 H14 N5 O8 P | 363.05821 | 362.05099 | 5.415 | [M-H]-1 | 150859655.6 |
| Apigetrin | C21 H20 O10 | 432.10554 | 431.09827 | 15.182 | [M-H]-1 | 186629361.1 |
| (±)-Abscisic acid | C15 H20 O4 | 264.13615 | 263.12888 | 13.251 | [M-H]-1 | 44699845.93 |
| (3S)-3-Methyl-5-[(1S,8aR)-2,5,5,8a-tetramethyl-4-oxo-1,4,4a,5,6,7,8,8a-octahydro-1-naphthalenyl]pentanoic acid | C20 H32 O3 | 320.23491 | 321.24219 | 21.41 | [M+H]+1 | 76791147.53 |
| N-Acetyl-DL-norvaline | C7 H13 N O3 | 159.08851 | 158.08124 | 7.779 | [M-H]-1 | 37478176.31 |
| Indole-3-acetyl-L-aspartic acid | C14 H14 N2 O5 | 290.0901 | 581.18665 | 10.589 | [2M+H]+1 | 63928984.67 |
| (-)-Caryophyllene oxide | C15 H24 O | 220.18278 | 221.19002 | 14.67 | [M+H]+1 | 78555609.08 |
| N,N-dimethyl-N'-(3-phenyl[1,2,4]triazolo[4,3-b]pyridazin-6-yl)iminoformamide | C14 H14 N6 | 266.12679 | 267.13406 | 7.022 | [M+H]+1 | 69835729.07 |
| 4-Acetamidobutanoic acid | C6 H11 N O3 | 145.07277 | 144.06549 | 7.283 | [M-H]-1 | 21260576.38 |
| Xanthosine | C10 H12 N4 O6 | 284.07595 | 283.0687 | 6.128 | [M-H]-1 | 35476192.26 |
| 5-hydroxy-4-methoxy-5,6-dihydro-2H-pyran-2-one | C6 H8 O4 | 144.04236 | 145.04964 | 4.625 | [M+H]+1 | 2808176800 |
| D-(+)-Malic acid | C4 H6 O5 | 134.02017 | 133.01289 | 1.686 | [M-H]-1 | 9776617940 |
| (2R,5R,6R)-3-[(1E,3E)-hepta-1,3-dien-1-yl]-5,6-dihydroxy-2-(hydroxymethyl)cyclohexan-1-one | C14 H22 O4 | 236.14124 | 237.14851 | 14.677 | [M+H]+1 | 119796221.5 |
| Naringenin | C15 H12 O5 | 272.06854 | 271.06143 | 14.376 | [M-H]-1 | 89613414.04 |
| Quercetin-3β-D-glucoside | C21 H20 O12 | 464.0957 | 463.08853 | 12.101 | [M-H]-1 | 71746760.15 |
| 3-(4-chlorophenyl)-4-imino-7-(1-pyrrolidinyl)-3,4-dihydropyrimido[4,5-d]pyrimidin-2(1H)-one | C16 H15 Cl N6 O | 342.09852 | 341.09125 | 13.558 | [M-H]-1 | 64651807.43 |
| N-({(2R,4S,5R)-5-[3-(4-Fluorophenyl)-1-methyl-1H-pyrazol-5-yl]-1-azabicyclo[2.2.2]oct-2-yl}methyl)-4-methoxybenzamide | C26 H29 F N4 O2 | 494.23646 | 493.22919 | 8.746 | [M-H]-1 | 127891671.1 |
| α-Lactose | C12 H22 O11 | 342.11587 | 360.14966 | 1.567 | [M+NH4]+1 | 2130494502 |
| DL-Metanephrine | C10 H15 N O3 | 197.10536 | 198.11264 | 6.807 | [M+H]+1 | 44484053.43 |
| 6-Chloroflavone | C15 H9 Cl O2 | 256.02509 | 255.01781 | 1.848 | [M-H]-1 | 425242602.9 |
| Hypoxanthine | C5 H4 N4 O | 136.03867 | 137.04594 | 5.234 | [M+H]+1 | 162853555.6 |
| 3-[4-(tert-butyl)-3-({5-[3-(trifluoromethyl)phenyl]-2H-1,2,3,4-tetraazol-2-yl}methyl)phenyl]-1,2,4-oxadiazole | C21 H19 F3 N6 O | 428.15303 | 427.14575 | 5.74 | [M-H]-1 | 76015210.96 |
| BMK methyl glycidate | C11 H12 O3 | 160.05256 | 193.08609 | 8.823 | [M+H+MeOH]+1 | 57911965.91 |
| 3-Butene-1,2,3-tricarboxylic acid | C7 H8 O6 | 188.03151 | 187.02423 | 3.689 | [M-H]-1 | 96538713.05 |
| N'3-(2,2-dimethylpropylidene)-1-(4-isopropylphenyl)-5-methyl-1H-pyrazole-3-carbohydrazide | C19 H26 N4 O | 326.20928 | 325.20209 | 17.106 | [M-H]-1 | 211567840.9 |
| Sebuthylazine | C9 H16 Cl N5 | 229.10627 | 212.103 | 4.179 | [M+H-H2O]+1 | 1033430852 |
| (3R,3aR,4R,4aR,7aR,8R,9aR)-3,4a,8-Trimethyl-2,5-dioxo-2,3,3a,4,4a,5,7a,8,9,9a-decahydroazuleno[6,5-b]furan-4-yl acetate | C17 H22 O5 | 323.17307 | 324.18036 | 13.526 | [M+H]+1 | 181181472.7 |
| 5-Methoxyindoleacetic acid | C11 H11 N O3 | 205.07414 | 206.08142 | 8.185 | [M+H]+1 | 41735899.27 |
| N-({(2R,4S,5R)-5-[3-(4-Fluorophenyl)-1-methyl-1H-pyrazol-5-yl]-1-azabicyclo[2.2.2]oct-2-yl}methyl)-4-methoxybenzamide | C26 H29 F N4 O2 | 494.23671 | 493.22943 | 14.759 | [M-H]-1 | 34330606.53 |
| Arecoline | C8 H13 N O2 | 155.09477 | 156.10207 | 7.973 | [M+H]+1 | 80530551.03 |
| (12Z)-9,10,11-trihydroxyoctadec-12-enoic acid | C18 H34 O5 | 352.22237 | 353.22964 | 17.253 | [M+H]+1 | 156262887.4 |
| p-Coumaryl alcohol 4-glucoside | C15 H20 O7 | 358.12662 | 357.11935 | 8.194 | [M-H]-1 | 12903088.81 |
| 7-(3,4-dihydroxyphenyl)-5-hydroxy-1-(4-hydroxyphenyl)heptan-3-one | C19 H22 O5 | 352.13075 | 353.138 | 16.345 | [M+H]+1 | 118147568.4 |
| N1-(1H-indol-4-yl)cyclohexane-1-carboxamide | C15 H18 N2 O | 264.1223 | 265.12958 | 7.32 | [M+H]+1 | 31651354.72 |
| Diisodecyl phthalate | C28 H46 O4 | 486.33428 | 469.33099 | 16.962 | [M+H-H2O]+1 | 901318474.8 |
| 4-oxo-4-(4-toluidino)but-2-enoic acid | C11 H11 N O3 | 205.0741 | 206.08138 | 10.607 | [M+H]+1 | 37159008.45 |
| Palmitoleic Acid | C16 H30 O2 | 276.20888 | 277.21616 | 17.84 | [M+H]+1 | 813187848.5 |
| (5E)-7-methylidene-10-oxo-4-(propan-2-yl)undec-5-enoic acid | C15 H24 O3 | 252.17223 | 253.1795 | 13.84 | [M+H]+1 | 834471940.9 |
| (2E)-4-Hydroxy-3,7-dimethyl-2,6-octadien-1-yl beta-D-glucopyranoside | C16 H28 O7 | 378.18898 | 377.1817 | 11.922 | [M-H]-1 | 135894939.6 |
| Uridine monophosphate (UMP) | C9 H13 N2 O9 P | 324.03596 | 323.02866 | 2.937 | [M-H]-1 | 40435460.42 |
| 3-(4-hydroxy-3-methoxyphenyl)propanoic acid | C10 H12 O4 | 186.03169 | 219.06519 | 17.225 | [M+H+MeOH]+1 | 16443105.15 |
| 5,7,3',4'-Tetrahydroxy-6,8-diprenylisoflavone | C25 H26 O6 | 422.17274 | 423.17984 | 19.387 | [M+H]+1 | 254459155.1 |
| L-Phenylalanine | C9 H11 N O2 | 165.07798 | 164.07072 | 5.908 | [M-H]-1 | 58849016.37 |
| 6-Deoxyhexopyranosyl-(1->4)-[hexopyranosyl-(1->6)]-1-O-[27-hydroxy-3,27,28-trioxolup-20(29)-en-28-yl]hexopyranose | C48 H74 O19 | 954.48252 | 953.4754 | 20.111 | [M-H]-1 | 59756039.4 |
| L-Phenylalanine | C9 H11 N O2 | 165.07805 | 164.07077 | 5.183 | [M-H]-1 | 30635616.3 |
| Isocitric acid | C6 H8 O7 | 192.02616 | 191.01889 | 1.614 | [M-H]-1 | 909484325.4 |
| BMK methyl glycidate | C11 H12 O3 | 160.05259 | 193.08612 | 11.235 | [M+H+MeOH]+1 | 195867870.9 |
| Sorbic acid | C6 H8 O2 | 112.05287 | 113.06014 | 7.365 | [M+H]+1 | 149094369.3 |
| N-{[(2R,3S,4R,5S)-3,4-Dihydroxy-5-{2-[4-(2-methoxyphenyl)-1-piperazinyl]-2-oxoethyl}tetrahydro-2-furanyl]methyl}-4-(dimethylamino)benzamide | C27 H36 N4 O6 | 548.2467 | 547.23944 | 12.586 | [M-H]-1 | 137371200.2 |
| (5E)-7-methylidene-10-oxo-4-(propan-2-yl)undec-5-enoic acid | C15 H24 O3 | 252.17236 | 253.17963 | 13.621 | [M+H]+1 | 724462033 |
| (3aR,5aR,9bR)-3a-hydroxy-5a,9-dimethyl-3-methylidene-2H,3H,3aH,4H,5H,5aH,6H,7H,8H,9bH-naphtho[1,2-b]furan-2-one | C15 H20 O3 | 270.12306 | 271.13034 | 16.641 | [M+H]+1 | 24799722.25 |
| di(3-pyridyl) 5-(tert-butyl)isophthalate | C22 H20 N2 O4 | 376.13805 | 377.14532 | 10.817 | [M+H]+1 | 64148467.94 |
| Ambrosic acid | C15 H20 O4 | 264.13608 | 265.14325 | 14.88 | [M+H]+1 | 129994344.8 |
| Riboflavin | C17 H20 N4 O6 | 188.06929 | 421.13681 | 10.803 | [2M+FA-H]-1 | 15098502.7 |
| N-(1-benzyl-4-piperidinyl)-1-[2-(2-pyridinyl)ethyl]-1H-pyrrole-2-carboxamide | C24 H28 N4 O | 388.23207 | 389.23932 | 10.103 | [M+H]+1 | 165887458.4 |
| 6-Acetylcodeine | C20 H23 N O4 | 341.16247 | 342.16974 | 8.865 | [M+H]+1 | 1038820681 |
| 6-Methylquinoline | C10 H9 N | 143.07367 | 144.08095 | 8.477 | [M+H]+1 | 138550504.9 |
| 2-Fluoro-6-{[2-(2-pyridyl)ethyl]amino}benzonitrile | C14 H12 F N3 | 241.10644 | 283.14032 | 3.143 | [M+ACN+H]+1 | 164807564.8 |
| 7-Hydroxycoumarine | C9 H6 O3 | 162.03163 | 163.03891 | 10.344 | [M+H]+1 | 535560560.1 |
| D-(-)-Quinic acid | C7 H12 O6 | 192.06248 | 191.05521 | 9.722 | [M-H]-1 | 313976705.4 |
| Guanine | C5 H5 N5 O | 151.04846 | 150.04118 | 6.061 | [M-H]-1 | 23510891.36 |
| 5-Sulfosalicylic acid | C7 H6 O6 S | 171.98259 | 216.9808 | 6.042 | [M+FA-H]-1 | 57593907.1 |
| S-Adenosylhomocysteine | C14 H20 N6 O5 S | 384.12709 | 383.11981 | 3.69 | [M-H]-1 | 76742730.71 |
| Apocynin | C9 H10 O3 | 166.06311 | 167.07039 | 15.412 | [M+H]+1 | 63139451.68 |
| 2-Isopropylmalic acid | C7 H12 O5 | 176.06742 | 175.06015 | 9.14 | [M-H]-1 | 722104353.1 |
| BB-22 3-Carboxyindole metabolite | C16 H19 N O2 | 257.1377 | 258.14499 | 9.057 | [M+H]+1 | 54233679.55 |
| 1-(2-chlorobenzyl)-2,4-dioxo-1,2,3,4-tetrahydropyrimidine-5-carbonitrile | C12 H8 Cl N3 O2 | 261.03071 | 260.02344 | 4.874 | [M-H]-1 | 22788240.8 |
| N-{[(2R,3S,4R,5S)-3,4-Dihydroxy-5-{2-oxo-2-[4-(2-pyridinyl)-1-piperazinyl]ethyl}tetrahydro-2-furanyl]methyl}-3-fluorobenzamide | C23 H27 F N4 O5 | 494.1819 | 493.17462 | 18.472 | [M-H]-1 | 140145533.5 |
| 4-{5-[(4-methylphenyl)methylene]-4-oxo-2-thioxo-1,3-thiazolan-3-yl}-N-(1,3-thiazol-2-yl)benzenesulfonamide | C20 H15 N3 O3 S4 | 336.16413 | 337.17136 | 1.205 | [M+H]+1 | 2820767980 |
| Guvacoline | C7 H11 N O2 | 141.07918 | 142.08646 | 5.889 | [M+H]+1 | 101411689.7 |
| Rifampicin | C43 H58 N4 O12 | 822.40329 | 821.39612 | 18.366 | [M-H]-1 | 6378900678 |
| 2-[(3-methylbenzo[b]thiophen-2-yl)carbonyl]benzoic acid | C17 H12 O3 S | 296.05339 | 295.04612 | 11.105 | [M-H]-1 | 52681102.8 |
| 3-(tert-Butyl)-N-[4-(2,3-dihydroimidazo[2,1-b][1,3]thiazol-6-yl)phenyl]-1-methyl-1H-pyrazole-5-carboxamide | C20 H23 N5 O S | 381.16343 | 380.15619 | 7.445 | [M-H]-1 | 62850365.31 |
| 1-({(1S,4S,6S)-6-Isopropyl-3-methyl-4-[2-(4-methyl-1-piperazinyl)-2-oxoethyl]-2-cyclohexen-1-yl}methyl)-3-(3-methoxyphenyl)urea | C26 H40 N4 O3 | 492.29336 | 491.28607 | 15.848 | [M-H]-1 | 106073357.4 |
| (3beta,5xi,9xi)-28-Hydroxy-28-oxoolean-12-en-3-yl beta-D-galactopyranosyl-(1-3)-[beta-D-glucopyranosyl-(1-2)]-beta-D-glucopyranosiduronic acid | C48 H76 O19 | 956.4984 | 957.50555 | 19.803 | [M+H]+1 | 16441133.7 |
| Guanosine monophosphate (GMP) | C10 H14 N5 O8 P | 363.05809 | 362.05099 | 6.68 | [M-H]-1 | 98951497.18 |
| 1-(3-Trifluoromethylphenyl)piperazine | C11 H13 F3 N2 | 230.10139 | 231.10864 | 1.427 | [M+H]+1 | 156971700.2 |
| Rifampicin | C43 H58 N4 O12 | 822.40343 | 821.39618 | 18.771 | [M-H]-1 | 3842710546 |
| Muramic acid | C9 H17 N O7 | 251.10036 | 252.10764 | 1.306 | [M+H]+1 | 789291087.5 |
| 5-Chloro NNEI | C24 H23 Cl N2 O | 390.15278 | 389.14551 | 9.202 | [M-H]-1 | 29970825.65 |
| 3-Methoxycinnamic acid | C10 H10 O3 | 160.05242 | 161.05969 | 10.969 | [M+H]+1 | 108959596.7 |
| Diacetoxyscirpenol | C19 H26 O7 | 366.16742 | 367.17468 | 14.365 | [M+H]+1 | 492415259.7 |
| 3-[4-(tert-butyl)-3-({5-[3-(trifluoromethyl)phenyl]-2H-1,2,3,4-tetraazol-2-yl}methyl)phenyl]-1,2,4-oxadiazole | C21 H19 F3 N6 O | 428.1531 | 427.14581 | 5.285 | [M-H]-1 | 39239799.8 |
| Phloretin | C15 H14 O5 | 274.08441 | 273.07718 | 13.668 | [M-H]-1 | 72521123.74 |
| Rifampicin | C43 H58 N4 O12 | 822.40376 | 821.39697 | 21.351 | [M-H]-1 | 117550198.7 |
| Corchorifatty acid F | C18 H32 O5 | 328.22514 | 327.21786 | 17.907 | [M-H]-1 | 56796190.78 |
| Rifampicin | C43 H58 N4 O12 | 1644.80862 | 821.39703 | 20.659 | [M-2H]-2 | 141302990.6 |
| Sebuthylazine | C9 H16 Cl N5 | 229.10631 | 230.11359 | 4.615 | [M+H]+1 | 233064850.9 |
| (2R,3S,4S,5R,6R)-2-(hydroxymethyl)-6-[2-(4-hydroxyphenyl)ethoxy]oxane-3,4,5-triol | C14 H20 O7 | 306.05304 | 339.08652 | 19.604 | [M+H+MeOH]+1 | 18890548.22 |
| (2E)-4-Hydroxy-3,7-dimethyl-2,6-octadien-1-yl beta-D-glucopyranoside | C16 H28 O7 | 378.18895 | 377.18167 | 11.313 | [M-H]-1 | 91045191.54 |
| 3',5,7-Trihydroxy-4'-methoxyflavanone | C16 H14 O6 | 302.07912 | 301.0719 | 14.647 | [M-H]-1 | 84670875.4 |
| 2-Aminoflubendazole | C14 H10 F N3 O | 255.08562 | 256.0929 | 3.17 | [M+H]+1 | 959749104.9 |
| 3-[2-(β-D-Glucopyranosyloxy)-4-methoxyphenyl]propanoic acid | C16 H22 O9 | 358.12641 | 417.14023 | 9.466 | [M-H+HAc]-1 | 158459913.5 |
| 2-[(4-methoxybenzyl)amino]-1-methyl-6-oxo-4-(2-thienyl)-1,6-dihydropyrimidine-5-carbonitrile | C18 H16 N4 O2 S | 352.09446 | 351.08719 | 17.688 | [M-H]-1 | 883083692.3 |
| Anabasine | C10 H14 N2 | 162.1158 | 163.12308 | 2.989 | [M+H]+1 | 216026977.2 |
| L-Glutathione oxidized | C20 H32 N6 O12 S2 | 612.15219 | 307.08334 | 3.61 | [M+2H]+2 | 105299371.4 |
| Cynaropicrin | C19 H22 O6 | 368.12587 | 369.13315 | 15.348 | [M+H]+1 | 60713495.68 |
| (3R,4S,6R)-N-(2-Methoxybenzyl)-6-{[4-(2-pyridinyl)-1H-1,2,3-triazol-1-yl]methyl}quinuclidine-3-carboxamide | C24 H28 N6 O2 | 478.24162 | 477.23434 | 10.631 | [M-H]-1 | 39038571.54 |
| 4-styrylpyridine | C13 H11 N | 181.08542 | 182.0927 | 5.333 | [M+H]+1 | 120616053.6 |
| N-[2-(4-methoxyphenoxy)-5-(trifluoromethyl)phenyl]-5-methyl-2-phenyl-1,3-oxazole-4-carboxamide | C25 H19 F3 N2 O4 | 468.13014 | 467.12286 | 11.626 | [M-H]-1 | 47197055.92 |
| 3-hydroxy-3-(2-pyridylmethyl)indolin-2-one | C14 H12 N2 O2 | 240.09041 | 241.09723 | 9.61 | [M+H]+1 | 62344988.59 |
| 2-Hydroxy-2-methyl-3-buten-1-yl beta-D-glucopyranoside | C11 H20 O7 | 310.12672 | 309.11945 | 5.323 | [M-H]-1 | 90311527.71 |
| (2R)-2-[(2R,5S)-5-[(2S)-2-hydroxybutyl]oxolan-2-yl]propanoic acid | C11 H20 O4 | 216.136 | 217.14328 | 13.225 | [M+H]+1 | 388374089.9 |
| Palmitoleic Acid | C16 H30 O2 | 293.23537 | 277.21609 | 18.761 | [M+H-NH3]+1 | 947202005.9 |
| (+)-ar-Turmerone | C15 H20 O | 216.1513 | 217.15857 | 16.596 | [M+H]+1 | 1404761685 |
| 3-Methoxycinnamic acid | C10 H10 O3 | 160.05253 | 193.08604 | 9.452 | [M+H+MeOH]+1 | 258678652.3 |
| α,α-Trehalose | C12 H22 O11 | 342.11601 | 360.14978 | 1.901 | [M+NH4]+1 | 2417805381 |
| Octylphosphonic acid | C8 H19 O3 P | 194.10573 | 195.11301 | 7.8 | [M+H]+1 | 102921972.8 |
| 5-hydroxy-2-(4-hydroxyphenyl)-7-[(3,4,5-trihydroxy-6-methyloxan-2-yl)oxy]-3-[(3,4,5-trihydroxyoxan-2-yl)oxy]-4H-chromen-4-one | C26 H28 O14 | 564.14802 | 563.14075 | 11.57 | [M-H]-1 | 107111191.5 |
| 2-hydroxy-6-[2-hydroxy-6-(hydroxymethyl)-4-methoxyphenoxy]-4-methylbenzoic acid | C16 H16 O7 | 342.07225 | 343.07953 | 17.379 | [M+H]+1 | 11949434.94 |
| Benzyl 6-O-beta-D-glucopyranosyl-beta-D-glucopyranoside | C19 H28 O11 | 372.1421 | 417.14038 | 10.705 | [M+FA-H]-1 | 12510580.66 |
| 2-Hydroxy-2-methyl-3-buten-1-yl beta-D-glucopyranoside | C11 H20 O7 | 310.12666 | 309.11938 | 7.8 | [M-H]-1 | 11420664.28 |
| 2,4-Dimethylbenzaldehyde | C9 H10 O | 134.07324 | 135.08052 | 12.909 | [M+H]+1 | 29550719.64 |
| α,α-Trehalose | C12 H22 O11 | 342.11577 | 387.11398 | 1.431 | [M+FA-H]-1 | 4770515420 |
| 4-(3-methoxyphenyl)-4-methyl-2,6-dioxopiperidine-3,5-dicarbonitrile | C15 H13 N3 O3 | 305.07884 | 306.08612 | 19.919 | [M+H]+1 | 48038543.28 |
| 2'-Deoxyinosine 5'-monophosphate | C10 H13 N4 O7 P | 332.05339 | 331.04611 | 14.616 | [M-H]-1 | 91545573.89 |
| Rifampicin | C43 H58 N4 O12 | 822.40365 | 821.39703 | 20.241 | [M-H]-1 | 85078786.1 |
| 3-Butene-1,2,3-tricarboxylic acid | C7 H8 O6 | 188.03149 | 187.02422 | 5.674 | [M-H]-1 | 38098971.04 |
| N-{4-[(2R,3R)-3-(Hydroxymethyl)-5-oxo-2-morpholinyl]phenyl}acetamide | C13 H16 N2 O4 | 286.09523 | 287.10248 | 11.604 | [M+H]+1 | 761832832.7 |
| 5-(1,2,4a,5-tetramethyl-7-oxo-1,2,3,4,4a,7,8,8a-octahydronaphthalen-1-yl)-3-methylpentanoic acid | C20 H32 O3 | 320.23512 | 321.24237 | 17.625 | [M+H]+1 | 53043928.62 |
| 2'-Deoxyguanosine 5'-monophosphate (dGMP) | C10 H14 N5 O7 P | 347.06299 | 348.07022 | 4.314 | [M+H]+1 | 126186345.4 |
| 3-[2-(1,3-Benzodioxol-5-yl)-7-methoxy-1-benzofuran-5-yl]-3-hydroxypropyl hexopyranoside | C25 H28 O11 | 490.153 | 549.16687 | 1.443 | [M-H+HAc]-1 | 300261766.3 |
| Pantothenic acid | C9 H17 N O5 | 219.11028 | 218.10297 | 6.747 | [M-H]-1 | 113007655.9 |
| (1R,9S)-5-[(E)-2-(4-Chlorophenyl)vinyl]-11-(5-pyrimidinylcarbonyl)-7,11-diazatricyclo[7.3.1.02,7]trideca-2,4-dien-6-one | C24 H21 Cl N4 O2 | 432.14189 | 433.14917 | 17.563 | [M+H]+1 | 303174031.9 |
| Oleanolic acid | C30 H48 O3 | 456.36026 | 439.35693 | 18.725 | [M+H-H2O]+1 | 129506134.6 |
| (1S,6R,11aR,13R,14aS)-1,13-dihydroxy-6-methyl-1H,4H,6H,7H,8H,9H,11aH,12H,13H,14H,14aH-cyclopenta[f]oxacyclotridecan-4-one | C16 H24 O4 | 297.19393 | 298.20123 | 15.513 | [M+H]+1 | 68884542.38 |
| 7-Hydroxycoumarine | C9 H6 O3 | 162.03172 | 163.03899 | 12.393 | [M+H]+1 | 318510544.6 |
| 4-oxo-5-phenylpentanoic acid | C11 H12 O3 | 174.0681 | 175.07538 | 13.184 | [M+H]+1 | 208153250.7 |
| 2,6-Di-tert-butyl-1,4-benzoquinone | C14 H20 O2 | 220.1463 | 221.15358 | 16.165 | [M+H]+1 | 259889164.1 |
| 5,6-dimethyl-3-[5-(trifluoromethyl)pyridin-2-yl]-1,2,4-triazine | C11 H9 F3 N4 | 254.07892 | 253.07164 | 10.229 | [M-H]-1 | 37985414.42 |
| 3-tert-Butyladipic acid | C10 H18 O4 | 202.12031 | 201.11246 | 12.144 | [M-H]-1 | 80169281.85 |
| γ-Linolenic acid ethyl ester | C20 H34 O2 | 312.26622 | 313.2735 | 21.568 | [M+H]+1 | 72105038.82 |
| 2,3-dihydroxypropyl 12-methyltridecanoate | C17 H34 O4 | 284.23509 | 285.24237 | 18.893 | [M+H]+1 | 111464566.5 |
| Ferulic acid | C10 H10 O4 | 194.05719 | 193.04991 | 10.795 | [M-H]-1 | 31867758.81 |
| Aspartame | C14 H18 N2 O5 | 294.1216 | 295.12888 | 8.976 | [M+H]+1 | 37179847.5 |
| Heptadecanoic Acid | C17 H34 O2 | 292.24001 | 293.24728 | 20.31 | [M+H]+1 | 36781003.9 |
| N-{4-[(2R,3R)-3-(Hydroxymethyl)-5-oxo-2-morpholinyl]phenyl}acetamide | C13 H16 N2 O4 | 286.09548 | 287.10275 | 10.007 | [M+H]+1 | 50746229.65 |
| 5-Hydroxyindole-3-acetic acid | C10 H9 N O3 | 191.05832 | 192.0656 | 7.847 | [M+H]+1 | 47262680.59 |
| 1-benzyl-3-(tert-butyl)-N-[4-(6-methyl-1,3-benzothiazol-2-yl)phenyl]-1H-pyrazole-5-carboxamide | C29 H28 N4 O S | 498.21731 | 481.21402 | 1.242 | [M+H-H2O]+1 | 167426774.2 |
| 3-[4-methyl-1-(2-methylpropanoyl)-3-oxocyclohexyl]butanoic acid | C15 H24 O4 | 290.15168 | 308.18552 | 15.974 | [M+NH4]+1 | 70359748.24 |
| (2S,3R,4S,5S,6R)-6-({[(2R,3R,4R,5S,6R)-3,4-dihydroxy-6-(hydroxymethyl)-5-{[(2S,3R,4R,5R,6S)-3,4,5-trihydroxy-6-methyloxan-2-yl]oxy}oxan-2-yl]oxy}methyl)-3,4,5-trihydroxyoxan-2-yl (4aS,6aS,6bR,9R,10S,12aR,14bS)-10-hydroxy-9-(hydroxymethyl)-2,2,6a,6b,9,12a-hexamethyl-1,2,3,4,4a,5,6,6a,6b,7,8,8a,9,10,11,12,12a,12b,13,14b-icosahydropicene-4a-carboxylate | C48 H78 O18 | 942.51885 | 943.52606 | 18.941 | [M+H]+1 | 38492695.24 |
| 7-Aminoflunitrazepam | C16 H14 F N3 O | 283.11706 | 284.12433 | 5.423 | [M+H]+1 | 470016102.5 |
| N-[3-(2-methylpyrimidin-4-yl)phenyl]-N'-phenylurea | C18 H16 N4 O | 287.11152 | 320.14508 | 1.505 | [M+H+MeOH]+1 | 81337409.28 |
| (1S,6R,11aR,13R,14aS)-1,13-dihydroxy-6-methyl-1H,4H,6H,7H,8H,9H,11aH,12H,13H,14H,14aH-cyclopenta[f]oxacyclotridecan-4-one | C16 H24 O4 | 262.15697 | 263.16415 | 16.898 | [M+H]+1 | 242788232.9 |
| L-Aspartic acid | C4 H7 N O4 | 133.03616 | 132.02888 | 1.284 | [M-H]-1 | 2132575726 |
| 4-hydroxy-5,8-dimethylquinoline-3-carboxylic acid | C12 H11 N O3 | 217.07409 | 218.08134 | 10.471 | [M+H]+1 | 55117217.42 |
| 3-[3-(beta-D-Glucopyranosyloxy)-2-hydroxyphenyl]propanoic acid | C15 H20 O9 | 344.11394 | 343.10666 | 15.876 | [M-H]-1 | 50156939.27 |
| 3,8,9-trihydroxy-10-propyl-3,4,5,8,9,10-hexahydro-2H-oxecin-2-one | C12 H20 O5 | 244.13087 | 243.12349 | 13.481 | [M-H]-1 | 938537095 |
| {(3S)-3-[5-(2-Fluorophenyl)-1,3,4-oxadiazol-2-yl]-1-pyrrolidinyl}(phenyl)methanone | C19 H16 F N3 O2 | 337.12721 | 338.13443 | 7.702 | [M+H]+1 | 47568221.54 |
| L-Glutamic acid | C5 H9 N O4 | 147.05286 | 295.11349 | 1.302 | [2M+H]+1 | 1672944447 |
| Avocadyne 1-acetate | C19 H34 O4 | 325.26129 | 309.24197 | 19.259 | [M+H-NH3]+1 | 68313445.31 |
| 2,6-Di-tert-butyl-1,4-benzoquinone | C14 H20 O2 | 188.12004 | 221.15344 | 14.357 | [M+H+MeOH]+1 | 228876206.1 |
| 6-Thiouric acid | C5 H4 N4 O2 S | 137.99779 | 182.99599 | 1.895 | [M+FA-H]-1 | 72377956.36 |
| 5-(6-hydroxy-6-methyloctyl)-2,5-dihydrofuran-2-one | C13 H22 O3 | 208.14621 | 209.1535 | 12.605 | [M+H]+1 | 341761782.4 |
| 1-(4-fluorophenyl)-2-(4-methoxyphenyl)-4-(2-naphthyl)butane-1,4-dione | C27 H21 F O3 | 412.14018 | 411.1329 | 13.91 | [M-H]-1 | 31733391.54 |
| N-({(2R,4S,5R)-5-[1-Methyl-3-(2-naphthyl)-1H-pyrazol-5-yl]-1-azabicyclo[2.2.2]oct-2-yl}methyl)-1,3-benzodioxole-5-carboxamide | C30 H30 N4 O3 | 540.24193 | 539.23468 | 11.185 | [M-H]-1 | 27805622.83 |
| 3-(2,6-Dioxocyclohexyl)propanenitrile | C9 H11 N O2 | 165.07898 | 166.08626 | 9.82 | [M+H]+1 | 132759935.7 |
| Stearoyl Ethanolamide | C20 H41 N O2 | 292.27617 | 310.31 | 22.832 | [M+NH4]+1 | 191190633.5 |
| 4-[4-(tert-butyl)-1,3-thiazol-2-yl]benzaldehyde 1-[2-nitro-4-(trifluoromethyl)phenyl]hydrazone | C21 H19 F3 N4 O2 S | 448.1219 | 447.11462 | 7.989 | [M-H]-1 | 20072069.47 |
| 1-{[5-(hydroxymethyl)-2,5,8a-trimethyl-1,4,4a,5,6,7,8,8a-octahydronaphthalen-1-yl]methyl}-4-methylidene-7-oxabicyclo[4.1.0]heptane-2,3,5-triol | C22 H34 O5 | 360.22975 | 361.23703 | 17.86 | [M+H]+1 | 56995998.81 |
| 4-oxo-5-phenylpentanoic acid | C11 H12 O3 | 174.06803 | 175.0753 | 13.763 | [M+H]+1 | 304854702.7 |
| 4-oxo-5-phenylpentanoic acid | C11 H12 O3 | 174.06806 | 175.07533 | 14.36 | [M+H]+1 | 138566307.8 |
| Phenacetin | C10 H13 N O2 | 179.09465 | 180.10193 | 10.395 | [M+H]+1 | 50746794.31 |
| 4-[4-(tert-butyl)-1,3-thiazol-2-yl]benzaldehyde 1-[2-nitro-4-(trifluoromethyl)phenyl]hydrazone | C21 H19 F3 N4 O2 S | 448.12184 | 447.11456 | 8.456 | [M-H]-1 | 29145335.22 |
| (1R,9S)-5-[(E)-2-(4-Chlorophenyl)vinyl]-11-(5-pyrimidinylcarbonyl)-7,11-diazatricyclo[7.3.1.02,7]trideca-2,4-dien-6-one | C24 H21 Cl N4 O2 | 432.1415 | 433.14877 | 17.001 | [M+H]+1 | 5881891401 |
| 3-Methoxysalicylic acid | C8 H8 O4 | 168.04466 | 167.03738 | 13.807 | [M-H]-1 | 138683709.2 |
| Miquelianin | C21 H18 O13 | 478.07466 | 477.06738 | 12.714 | [M-H]-1 | 259482836.5 |
| (2E)-3-Phenyl-2-propen-1-yl 6-O-beta-D-arabinofuranosyl-beta-D-glucopyranoside | C20 H28 O10 | 428.16818 | 427.16095 | 12.878 | [M-H]-1 | 24409848.11 |
| (2S,3S,4S,5R,6R)-6-{[(2S,3R,4R,6aR,6bS,8aS,12aS,14bR)-4-formyl-2-hydroxy-4,6a,6b,11,11,14b-hexamethyl-8a-({[(2S,3R,4S,5S,6R)-3,4,5-trihydroxy-6-(hydroxymethyl)oxan-2-yl]oxy}carbonyl)-1,2,3,4,4a,5,6,6a,6b,7,8,8a,9,10,11,12,12a,14,14a,14b-icosahydropicen-3-yl]oxy}-3,4,5-trihydroxyoxane-2-carboxylic acid | C42 H64 O16 | 841.44829 | 842.45557 | 19.629 | [M+H]+1 | 71763749.89 |
| Thymine | C5 H6 N2 O2 | 109.01661 | 127.05043 | 6.386 | [M+NH4]+1 | 115045476.9 |
| (S)-N-α-benzoylarginine ethyl ester | C15 H22 N4 O3 | 306.16918 | 307.17645 | 7.644 | [M+H]+1 | 88618076.89 |
| (1S,6R,11aR,13R,14aS)-1,13-dihydroxy-6-methyl-1H,4H,6H,7H,8H,9H,11aH,12H,13H,14H,14aH-cyclopenta[f]oxacyclotridecan-4-one | C16 H24 O4 | 262.15673 | 263.164 | 14.36 | [M+H]+1 | 136852279.2 |
| (2S,3S,4S,5R,6R)-6-{[(2S,3R,4R,6aR,6bS,8aS,12aS,14bR)-4-formyl-2-hydroxy-4,6a,6b,11,11,14b-hexamethyl-8a-({[(2S,3R,4S,5S,6R)-3,4,5-trihydroxy-6-(hydroxymethyl)oxan-2-yl]oxy}carbonyl)-1,2,3,4,4a,5,6,6a,6b,7,8,8a,9,10,11,12,12a,14,14a,14b-icosahydropicen-3-yl]oxy}-3,4,5-trihydroxyoxane-2-carboxylic acid | C42 H64 O16 | 824.41835 | 825.4256 | 20.731 | [M+H]+1 | 317860266 |
| N-[(3S,3aS,8S,9S,9aS,9bS)-3,5a,9-Trimethyl-2-oxododecahydronaphtho[1,2-b]furan-8-yl]acetamide | C17 H27 N O3 | 333.1898 | 316.18649 | 11.077 | [M+H-H2O]+1 | 77450791.79 |
| 5'-(furan-3-yl)-4a-hydroxy-2,5-dimethyl-3,4,4a,7,8,8a-hexahydro-2H-spiro[naphthalene-1,3'-oxolane]-2',7-dione | C19 H22 O5 | 352.13097 | 353.13824 | 18.833 | [M+H]+1 | 7995149.526 |
| 3-Desoxy-3,4-methylenedioxy pyrovalerone | C17 H23 N O2 | 273.17287 | 274.18015 | 6.733 | [M+H]+1 | 69503157.29 |
| 3-Desoxy-3,4-methylenedioxy pyrovalerone | C17 H23 N O2 | 273.16884 | 274.17612 | 6.433 | [M+H]+1 | 9424346.448 |
| (2R,3R,4S,5S,6R)-2-[2-(4-methoxyphenyl)ethoxy]-6-({[(2S,3R,4S,5S)-3,4,5-trihydroxyoxan-2-yl]oxy}methyl)oxane-3,4,5-triol | C20 H30 O11 | 441.22377 | 464.21307 | 10.497 | [M+Na]+1 | 23912388.83 |
| N-Benzylformamide | C8 H9 N O | 118.04203 | 136.07585 | 2.952 | [M+NH4]+1 | 504951914.1 |
| 4-oxododecanedioic acid | C12 H20 O5 | 226.12032 | 227.12759 | 12.715 | [M+H]+1 | 195515000 |
| Muscone | C16 H30 O | 238.22931 | 239.23657 | 21.815 | [M+H]+1 | 362114260.3 |
| 2-(2-pyridyl)-2-{2-[4-(trifluoromethoxy)phenyl]hydrazono}acetonitrile | C14 H9 F3 N4 O | 306.07725 | 305.06998 | 12.221 | [M-H]-1 | 1236950742 |
| (1'S,2'S)-3',11'-dihydroxy-1',2',5'-trimethyl-8'-oxaspiro[oxirane-2,12'-tricyclo[7.2.1.0Â?,â·]dodecan]-5'-en-4'-one | C15 H20 O5 | 262.12045 | 263.12769 | 11.628 | [M+H]+1 | 149420385.4 |
| 1-(2-furyl)pentane-1,4-dione | C9 H10 O3 | 188.04742 | 189.05472 | 10.397 | [M+H]+1 | 28897165.93 |
| N-Benzyl-2-[(2S,3R,4S,5R)-3,4-dihydroxy-5-{[(phenylsulfonyl)amino]methyl}tetrahydro-2-furanyl]-N-methylacetamide | C21 H26 N2 O6 S | 366.15536 | 479.14102 | 6.8 | [M-H+TFA]-1 | 29358738.37 |
| Stiripentol | C14 H18 O3 | 216.11502 | 217.1223 | 13.08 | [M+H]+1 | 179732475.9 |
| Calocarpin | C20 H20 O4 | 324.14204 | 323.13477 | 9.736 | [M-H]-1 | 62249066.82 |
| Thymidine | C10 H14 N2 O5 | 242.09413 | 241.08685 | 19.695 | [M-H]-1 | 31857739.27 |
| 1-(4-fluorophenyl)-2-(4-methoxyphenyl)-4-(2-naphthyl)butane-1,4-dione | C27 H21 F O3 | 412.14085 | 411.13358 | 14.5 | [M-H]-1 | 5500928.626 |
| (14E,16S,17S)-8-(4-Morpholinyl)-17-[2-(4-morpholinyl)-2-oxoethyl]-12-oxa-1,4-diazatricyclo[14.3.1.06,11]icosa-6,8,10,14-tetraen-2-one | C27 H38 N4 O5 | 534.25947 | 533.2522 | 15.804 | [M-H]-1 | 67520049.96 |
| AMB | C19 H27 N3 O3 | 345.20522 | 346.21249 | 9.34 | [M+H]+1 | 104917597.2 |
| 5-Methoxy DiPT | C17 H26 N2 O | 274.20458 | 275.21185 | 7.546 | [M+H]+1 | 36101649.2 |
| N-{4-[(R)-[(3R)-4-Benzyl-5-oxo-3-morpholinyl](hydroxy)methyl]phenyl}acetamide | C20 H22 N2 O4 | 400.15819 | 399.15091 | 7.333 | [M-H]-1 | 11165891.65 |
| 2-[2-nitro-4-(trifluoromethyl)phenoxy]ethyl 5-methyl-3-phenylisoxazole-4-carboxylate | C20 H15 F3 N2 O6 | 265.10637 | 266.11365 | 7.068 | [M+H]+1 | 71956463.12 |
| N1-(1H-1,2,3-benzotriazol-5-yl)-3,4,5-trimethoxybenzamide | C16 H16 N4 O4 | 328.11595 | 327.10867 | 10.505 | [M-H]-1 | 37825887.65 |
| 1,5-Naphthalenediamine | C10 H10 N2 | 117.05798 | 159.09172 | 7.204 | [M+ACN+H]+1 | 85669650.62 |
| ethyl 1-methylpyrrolo[1,2-a]pyrazine-7-carboxylate | C11 H12 N2 O2 | 204.09002 | 205.09734 | 6.374 | [M+H]+1 | 42726431.05 |
| (-)-Corey lactone | C8 H12 O4 | 172.07261 | 171.06534 | 8.118 | [M-H]-1 | 36957797.52 |
| (S)-N-α-benzoylarginine ethyl ester | C15 H22 N4 O3 | 289.14238 | 307.17621 | 8.981 | [M+NH4]+1 | 1142144105 |
| 2-Fluoro-6-{[2-(2-pyridyl)ethyl]amino}benzonitrile | C14 H12 F N3 | 241.10634 | 242.11362 | 5.583 | [M+H]+1 | 211334413.5 |
| 3-hydroxy-6-methoxy-2-phenyl-4H-chromen-4-one | C16 H12 O4 | 250.06293 | 251.07018 | 17.323 | [M+H]+1 | 198953431.1 |
| 4-Hydroxybenzoic acid | C7 H6 O3 | 138.03185 | 139.03912 | 8.72 | [M+H]+1 | 85462403.51 |
| 2-(4-Hydroxyphenyl)ethyl 6-O-[(2R,3R,4R)-3,4-dihydroxy-4-(hydroxymethyl)tetrahydro-2-furanyl]-beta-D-glucopyranoside | C19 H28 O11 | 478.17047 | 515.11908 | 10.356 | [M-2H+K]-1 | 1718345276 |
| Thymidine | C10 H14 N2 O5 | 242.0904 | 287.08881 | 6.396 | [M+FA-H]-1 | 60660814.9 |
| Mussaenosidic acid | C16 H24 O10 | 393.16365 | 394.17093 | 6.052 | [M+H]+1 | 26884448.83 |
| 2-[(1S,4S,5S)-5-Isopropyl-4-({[(4-methoxyphenyl)sulfonyl]amino}methyl)-2-methyl-2-cyclohexen-1-yl]-N-(2-propyn-1-yl)acetamide | C23 H32 N2 O4 S | 864.41438 | 863.4071 | 16.851 | [M-H]-1 | 36020416.86 |
| D-Saccharic acid | C6 H10 O8 | 164.03125 | 209.02951 | 1.536 | [M+FA-H]-1 | 913525945.5 |
| (1S)-1,5-Anhydro-2-O-(6-deoxy-α-L-mannopyranosyl)-1-[5,7-dihydroxy-2-(4-hydroxyphenyl)-4-oxo-4H-chromen-6-yl]-D-glucitol | C27 H30 O14 | 532.15787 | 577.15607 | 15.065 | [M+FA-H]-1 | 1068657442 |
| 3-[4-(tert-butyl)anilino]-2-(3-thienylcarbonyl)acrylonitrile | C18 H18 N2 O S | 310.10893 | 309.10165 | 14.316 | [M-H]-1 | 123911812.9 |
| Alprazolam | C17 H13 Cl N4 | 143.04883 | 309.08676 | 14.916 | [2M+Na]+1 | 157145769.1 |
| AL 8810 Methyl ester | C25 H33 F O4 | 438.21126 | 439.21854 | 7.168 | [M+H]+1 | 31606457.41 |
| 3-Ethyl-4-hydroxy-1-phenyl-1,2-dihydroquinolin-2-one | C17 H15 N O2 | 265.10624 | 266.11349 | 7.528 | [M+H]+1 | 280438710.2 |
| N-benzyl-N-isopropyl-N'-[4-(trifluoromethoxy)phenyl]urea | C18 H19 F3 N2 O2 | 306.13138 | 351.12958 | 10.52 | [M+FA-H]-1 | 169278079.5 |
| 1-(3,4-dimethoxyphenyl)ethan-1-one oxime | C10 H13 N O3 | 195.08975 | 196.09703 | 9.53 | [M+H]+1 | 85485108.26 |
| 1-phenethyl-5-(trifluoromethyl)-2,3-dihydro-1H-benzo[d]imidazole-2-thione | C16 H13 F3 N2 S | 322.08012 | 321.07285 | 7.177 | [M-H]-1 | 13162862.48 |
| 6-Chloro-N2,N3-diethylquinoxaline-2,3-diamine | C12 H15 Cl N4 | 218.06911 | 251.1026 | 10.341 | [M+H+MeOH]+1 | 66039446.38 |
| (3R,4S)-4,6,8-Trihydroxy-7-methoxy-3-methyl-3,4-dihydro-1H-isochromen-1-one | C11 H12 O6 | 240.06319 | 239.05591 | 10.148 | [M-H]-1 | 288330361.5 |
| Corticosterone | C21 H30 O4 | 382.18377 | 427.18201 | 10.827 | [M+FA-H]-1 | 146334544.3 |
| (3R)-8-hydroxy-3-(4-methoxyphenyl)-3,4-dihydro-1H-2-benzopyran-1-one | C16 H14 O4 | 270.08907 | 303.1225 | 13.841 | [M+H+MeOH]+1 | 109242115.1 |
| [1,1'-biphenyl]-2,2'-dicarboxylic acid | C14 H10 O4 | 182.03647 | 241.05034 | 19.481 | [M-H+HAc]-1 | 157420220.8 |
| (3R)-8-hydroxy-3-(4-methoxyphenyl)-3,4-dihydro-1H-2-benzopyran-1-one | C16 H14 O4 | 270.08931 | 269.08203 | 19.585 | [M-H]-1 | 72164273.4 |
| Caffeic acid | C9 H8 O4 | 148.016 | 149.0233 | 18.42 | [M+H]+1 | 1302017141 |
| 3-[(1R,9S)-11-(1-Acetyl-4-piperidinyl)-6-oxo-7,11-diazatricyclo[7.3.1.02,7]trideca-2,4-dien-5-yl]benzonitrile | C25 H28 N4 O2 | 438.2116 | 439.21887 | 7.902 | [M+H]+1 | 22004337.54 |
| L-Threonic acid | C4 H8 O5 | 136.03615 | 195.05002 | 1.364 | [M-H+HAc]-1 | 12057979135 |
| Theophylline | C7 H8 N4 O2 | 120.04118 | 179.05507 | 1.331 | [M-H+HAc]-1 | 8145996173 |
| 5-Fluoro-3,5-AB-PFUPPYCA | C20 H26 F2 N4 O2 | 392.19862 | 391.19135 | 18.688 | [M-H]-1 | 15869077.13 |
| 1-(4,7-Dimethylpyrazolo[5,1-c][1,2,4]triazin-3-yl)ethan-1-one | C9 H10 N4 O | 130.06211 | 189.07602 | 10.383 | [M-H+HAc]-1 | 364748335.8 |
| 1-(4-fluorophenyl)-4-[(2-phenyl-1H-imidazol-4-yl)methyl]piperazine | C20 H21 F N4 | 336.1797 | 337.18698 | 9.291 | [M+H]+1 | 69684596.63 |
| 1-(4,7-Dimethylpyrazolo[5,1-c][1,2,4]triazin-3-yl)ethan-1-one | C9 H10 N4 O | 190.0835 | 189.07611 | 11.574 | [M-H]-1 | 210514069.1 |
| 3-[(E)-2-[(1R,4aS,5R,6R,8aR)-6-hydroxy-5-(hydroxymethyl)-5,8a-dimethyl-2-methylidene-decahydronaphthalen-1-yl]ethenyl]-2,5-dihydrofuran-2-one | C20 H28 O4 | 314.18545 | 315.19348 | 18.686 | [M+H]+1 | 36378714.53 |
| 4-(tert-butyl)phenyl 3,5-dimethylisoxazole-4-carboxylate | C16 H19 N O3 | 273.13664 | 274.14392 | 8.569 | [M+H]+1 | 56114262.35 |
| 6-Methyl[1,2,4]triazolo[4,3-b]pyridazin-8-ol | C6 H6 N4 O | 150.05185 | 209.06584 | 1.496 | [M-H+HAc]-1 | 419068194.5 |
| 4-Methoxybenzaldehyde N-[6-(tert-butyl)thieno[3,2-d]pyrimidin-4-yl]hydrazone | C18 H20 N4 O S | 340.13094 | 339.12372 | 17.33 | [M-H]-1 | 36631185.2 |
| Capryloylglycine | C10 H19 N O3 | 201.13579 | 200.12851 | 12.356 | [M-H]-1 | 16149085.85 |
| 1-Benzyl-3-[2-(2-furyl)vinyl]-4,5-dihydro-1H-pyrazole | C16 H16 N2 O | 252.12227 | 253.12955 | 5.949 | [M+H]+1 | 360478498 |
| Pyridoxine | C8 H11 N O3 | 169.07401 | 170.08128 | 7.013 | [M+H]+1 | 334803106 |
| N'1-(3-phenylprop-2-enylidene)-3-(4-hydroxyphenyl)propanohydrazide | C18 H18 N2 O2 | 294.13163 | 293.12451 | 9.42 | [M-H]-1 | 106300944.8 |
| 1-(3-ethyl-2,4-dihydroxy-6-methoxyphenyl)butan-1-one | C13 H18 O4 | 220.10985 | 221.11711 | 17.418 | [M+H]+1 | 787331766.9 |
| 5,7-Dihydroxy-2-(4-hydroxy-3-methoxyphenyl)-6-(3-methyl-2-buten-1-yl)-2,3-dihydro-4H-chromen-4-one | C21 H22 O6 | 370.14126 | 371.1485 | 15.671 | [M+H]+1 | 205333561.3 |
| {5-[({3-[(5-{[Benzyl(methyl)amino]methyl}-1,2-oxazol-3-yl)methyl]-3-oxetanyl}amino)methyl]-2-furyl}methanol | C22 H27 N3 O4 | 419.17888 | 420.18616 | 9.924 | [M+H]+1 | 237159285.7 |
| 1-{4-[(3S)-3-(5-Fluoro-1H-benzimidazol-2-yl)-1-pyrrolidinyl]-1-piperidinyl}ethanone | C18 H23 F N4 O | 330.18987 | 331.19714 | 11.821 | [M+H]+1 | 124991755.8 |
| D-(+)-Glucose | C6 H12 O6 | 226.06824 | 225.06096 | 1.326 | [M-H]-1 | 3422649315 |
| 6,18,19-Trihydroxytrachyloban-2-one | C20 H30 O4 | 334.21214 | 379.21027 | 17.857 | [M+FA-H]-1 | 27262928.11 |
| 2-[1-(2H-1,3-benzodioxol-5-yl)propan-2-yl]-6-methoxy-4-(prop-2-en-1-yl)phenol | C20 H22 O4 | 326.15172 | 327.159 | 12.865 | [M+H]+1 | 122881672.1 |
| Avermectin B1a | C48 H72 O14 | 872.47713 | 871.46985 | 18.976 | [M-H]-1 | 82458609.62 |
| SDB-006 N-phenyl analog | C20 H22 N2 O | 306.16928 | 305.16202 | 8.965 | [M-H]-1 | 31822263.28 |
| 3-Methyl-5-(5,5,8a-trimethyl-2-methylene-7-oxodecahydro-1-naphthalenyl)pentyl acetate | C22 H36 O3 | 343.30847 | 344.31573 | 21.187 | [M+H]+1 | 22141488.95 |
| N-{3-[(3,5-difluorobenzyl)oxy]pyridin-2-yl}-4-pentylbenzenesulfonamide | C23 H24 F2 N2 O3 S | 446.1427 | 445.13541 | 9.329 | [M-H]-1 | 17818547.91 |
| N-{[(2R,3S,4R,5S)-3,4-Dihydroxy-5-{2-[4-(2-methoxyphenyl)-1-piperazinyl]-2-oxoethyl}tetrahydro-2-furanyl]methyl}-3-fluorobenzamide | C25 H30 F N3 O6 | 523.19175 | 522.18439 | 8.582 | [M-H]-1 | 22657803.2 |
| N-[3-(aminosulfonyl)phenyl]-2,3-dihydro-1,4-benzodioxine-2-carboxamide | C15 H14 N2 O5 S | 274.04516 | 333.05899 | 1.703 | [M-H+HAc]-1 | 176406443.4 |
| Benzylpiperazine | C11 H16 N2 | 176.13153 | 177.13881 | 8.336 | [M+H]+1 | 67366773.81 |
| myricetin 3-O-beta-D-galactopyranoside | C21 H20 O13 | 480.09056 | 481.09781 | 11.501 | [M+H]+1 | 56075887 |
| N-[(1R,9S)-11-Benzoyl-6-oxo-7,11-diazatricyclo[7.3.1.02,7]trideca-2,4-dien-5-yl]-4-fluorobenzamide | C25 H22 F N3 O3 | 431.16155 | 432.16882 | 8.294 | [M+H]+1 | 41251956.25 |
| Avermectin B1a | C48 H72 O14 | 872.47682 | 871.46954 | 18.588 | [M-H]-1 | 164009557.4 |
| Indole-3-acetyl-L-aspartic acid | C14 H14 N2 O5 | 290.09008 | 291.09738 | 11.55 | [M+H]+1 | 67932982.52 |
| 2-(1,3-Benzodioxol-5-yl)-4,5,6,7-tetramethyl-1H-benzimidazole | C18 H18 N2 O2 | 294.13171 | 293.12442 | 9.636 | [M-H]-1 | 95589429.92 |
| Heptanophenone | C13 H18 O | 190.13578 | 191.14305 | 15.451 | [M+H]+1 | 173327087.3 |
| Asperulosidic acid | C18 H24 O12 | 432.12649 | 431.11914 | 9.155 | [M-H]-1 | 103949054.7 |
| Nootkatone | C15 H22 O | 236.17745 | 237.18469 | 14.943 | [M+H]+1 | 177635029.3 |
| 5-{5-[(2S)-1-(Cyclopropylmethyl)-2-pyrrolidinyl]-1,2,4-oxadiazol-3-yl}-N-(2-methoxyethyl)-2-pyridinamine | C18 H25 N5 O2 | 365.18389 | 366.19116 | 8.123 | [M+H]+1 | 101238069.5 |
| Murrangatin | C15 H16 O5 | 276.09996 | 259.09656 | 14.042 | [M+H-H2O]+1 | 50521081.13 |
| 1,5,8-Trihydroxy-9-oxo-9H-xanthen-3-yl beta-D-glucopyranoside | C19 H18 O11 | 422.08258 | 421.07544 | 1.725 | [M-H]-1 | 207345892.8 |
| (1R,3R,8S,10R,13S,16S,17R)-6,12,17-Trihydroxy-16-methyl-8-(2-methyl-2-propanyl)-2,4,14,19-tetraoxahexacyclo[8.7.2.01,11 03,7 07,11 013,17]nonadecane-5,15,18-trione | C20 H24 O10 | 406.1296 | 405.12228 | 14.908 | [M-H]-1 | 28287152.63 |
| N-({(2R,4S,5R)-5-[1-Methyl-3-(2-naphthyl)-1H-pyrazol-5-yl]-1-azabicyclo[2.2.2]oct-2-yl}methyl)methanesulfonamide | C23 H28 N4 O2 S | 470.20003 | 469.19275 | 11.052 | [M-H]-1 | 37808094.7 |
| 6-[2-(Trifluoromethyl)phenyl]-1,3,5-triazine-2,4-diamine | C10 H8 F3 N5 | 255.07428 | 254.067 | 7.171 | [M-H]-1 | 20529510.52 |
| 7-{[(2E)-3,7-Dimethyl-2,6-octadien-1-yl]oxy}-1,3-dihydroxy-9H-xanthen-9-one | C23 H24 O5 | 380.16514 | 379.1579 | 22.005 | [M-H]-1 | 9019309.578 |
| 1-(4-{5-[(2S)-1-(4-Methylbenzyl)-2-pyrrolidinyl]-1,2,4-oxadiazol-3-yl}-2-pyridinyl)-4-piperidinecarboxamide | C25 H30 N6 O2 | 468.22212 | 469.2294 | 7.808 | [M+H]+1 | 44540493.3 |
| 3-[3-(beta-D-Glucopyranosyloxy)-2-hydroxyphenyl]propanoic acid | C15 H20 O9 | 344.11076 | 343.10349 | 8.094 | [M-H]-1 | 30340309.78 |
| Methyl (6S)-5-(4-fluorobenzoyl)-3-methyl-4,5,6,7-tetrahydro-3H-imidazo[4,5-c]pyridine-6-carboxylate | C16 H16 F N3 O3 | 317.12239 | 318.12967 | 2.448 | [M+H]+1 | 143078220.1 |
| 5,7-dihydroxy-3-[(4-methoxyphenyl)methyl]-3,4-dihydro-2H-1-benzopyran-4-one | C17 H16 O5 | 290.05532 | 323.08884 | 19.905 | [M+H+MeOH]+1 | 18124549 |
| 3,5-Dimethoxybenzoic acid | C9 H10 O4 | 182.05805 | 183.06532 | 10.816 | [M+H]+1 | 109875260.8 |
| 6-Hydroxy-8-methoxy-3-methyl-3,4-dihydro-1H-isochromen-1-one | C11 H12 O4 | 208.07349 | 209.08076 | 11.981 | [M+H]+1 | 192421796.7 |
| ethyl 3-cyano-2-hydroxy-6-phenylisonicotinate | C15 H12 N2 O3 | 268.08097 | 267.0737 | 5.226 | [M-H]-1 | 78038026.82 |
| 5α-Dihydrotestosterone | C19 H30 O2 | 258.19829 | 259.2056 | 17.839 | [M+H]+1 | 60889170.59 |
| (1S,3S)-N-Isopropyl-2,2-dimethyl-3-{[5-(phenoxymethyl)-1,2-oxazol-3-yl]methyl}cyclobutanamine | C20 H28 N2 O2 | 287.18428 | 329.21811 | 10.298 | [M+ACN+H]+1 | 26888355.95 |
| KPH | C17 H28 N6 O4 | 362.20476 | 363.21204 | 11.405 | [M+H]+1 | 93542710.01 |
| 3-[2-(4-chlorophenyl)-2-oxoethyl]-2,3-dihydropyrido[2,3-d][1,3]oxazol-2-one | C14 H9 Cl N2 O3 | 288.03004 | 287.02283 | 13.239 | [M-H]-1 | 53423357.09 |
| 2,6-Bis[(2-hydroxyethyl)amino]-3-nitrobenzonitrile | C11 H14 N4 O4 | 266.10021 | 265.09293 | 4.886 | [M-H]-1 | 238413614.1 |
| Phenacetin | C10 H13 N O2 | 358.18937 | 180.10196 | 5.322 | [M+2H]+2 | 158413276.3 |
| 4-[5-(4-chloro-2-nitrophenyl)-2-furyl]-2,6-dimethyl-1,4-dihydropyridine-3,5-dicarbonitrile | C19 H13 Cl N4 O3 | 380.07158 | 381.07886 | 1.382 | [M+H]+1 | 699499251.3 |
| 2-(3-Pyrazin-2-yl-1,2,4-oxadiazol-5-yl)ethanohydrazide | C8 H8 N6 O2 | 220.07299 | 219.06583 | 17.18 | [M-H]-1 | 31072625.21 |
| Methyl (6S)-5-(4-fluorobenzoyl)-3-methyl-4,5,6,7-tetrahydro-3H-imidazo[4,5-c]pyridine-6-carboxylate | C16 H16 F N3 O3 | 317.12233 | 318.12961 | 2.776 | [M+H]+1 | 147343689.8 |
| 3-(benzoylamino)benzyl benzoate | C21 H17 N O3 | 331.12648 | 332.13376 | 7.456 | [M+H]+1 | 45415038.48 |
| 1-{4-[(2S,4R)-4-Hydroxy-2-{3-[4-(trifluoromethoxy)phenyl]-1,2,4-oxadiazol-5-yl}-1-pyrrolidinyl]-1-piperidinyl}ethanone | C20 H23 F3 N4 O4 | 362.16004 | 475.14584 | 9.344 | [M-H+TFA]-1 | 18894402.44 |
| CMPF | C12 H16 O5 | 240.09962 | 239.09225 | 10.712 | [M-H]-1 | 66857523.95 |
| 1,3-diazaspiro[4.5]decane-2,4-dione | C8 H12 N2 O2 | 168.09003 | 169.09731 | 6.172 | [M+H]+1 | 75284572.12 |
| 2-[(2S,3R,4S,5R)-5-{[(3-Chlorobenzyl)amino]methyl}-3,4-dihydroxytetrahydro-2-furanyl]-N-cyclopropylacetamide | C17 H23 Cl N2 O4 | 390.1162 | 389.10892 | 4.796 | [M-H]-1 | 404515164.5 |
| ethyl 4,5-dimethyl-2-[(quinolin-6-ylcarbonyl)amino]thiophene-3-carboxylate | C19 H18 N2 O3 S | 354.11018 | 355.11737 | 18.169 | [M+H]+1 | 99160685.23 |
| (1E)-5-hydroxy-1,7-diphenylhept-1-en-3-one | C19 H20 O2 | 302.12661 | 303.13388 | 8.07 | [M+H]+1 | 111014374.3 |
| 10-HDA | C10 H18 O3 | 186.12481 | 185.11754 | 14.598 | [M-H]-1 | 20372733.18 |
| N-{3-[(3,5-difluorobenzyl)oxy]pyridin-2-yl}-4-pentylbenzenesulfonamide | C23 H24 F2 N2 O3 S | 446.14257 | 445.13507 | 9.05 | [M-H]-1 | 16881216.12 |
| Hexamethylene diisocyanate | C8 H12 N2 O2 | 153.09035 | 186.12384 | 5.317 | [M+H+MeOH]+1 | 143222109.3 |
| (1E)-5-hydroxy-1,7-diphenylhept-1-en-3-one | C19 H20 O2 | 302.12682 | 303.13409 | 8.305 | [M+H]+1 | 128154118.9 |
| 3-Hydroxy-3-methylglutaric acid | C6 H10 O5 | 162.05191 | 161.04463 | 3.875 | [M-H]-1 | 1229743604 |
| Thiopental | C11 H18 N2 O2 S | 242.10548 | 241.0981 | 11.585 | [M-H]-1 | 35461905.08 |
| N4-[2-({[4-(trifluoromethyl)phenyl]sulfonyl}amino)ethyl]morpholine-4-carboxamide | C14 H18 F3 N3 O4 S | 381.09273 | 380.08545 | 1.75 | [M-H]-1 | 58475824.59 |
| Benzyl acrylfentanyl | C21 H24 N2 O | 320.18505 | 321.19223 | 9.293 | [M+H]+1 | 26179764.35 |
| Prostaglandin A3 | C20 H28 O4 | 332.19853 | 333.20581 | 19.523 | [M+H]+1 | 39513550.27 |
| (2E,4E)-N-(1,3-dihydroxy-3-methylpentan-2-yl)-2-methylhexa-2,4-dienamide | C13 H23 N O3 | 241.16763 | 242.17491 | 11.548 | [M+H]+1 | 119796446.8 |
| Nomifensine | C16 H18 N2 | 238.14299 | 239.15024 | 7.03 | [M+H]+1 | 80723048.73 |
| (5ξ,9ξ,16ξ)-17-Hydroxykauran-19-oic acid | C20 H32 O3 | 315.27738 | 316.28461 | 19.84 | [M+H]+1 | 55368132.85 |
| Calocarpin | C20 H20 O4 | 324.14219 | 323.13495 | 6.569 | [M-H]-1 | 18495321.15 |
| 4-Methoxybenzaldehyde | C8 H8 O2 | 136.0526 | 137.05989 | 8.572 | [M+H]+1 | 42693907.49 |
| Cuminaldehyde | C10 H12 O | 166.09949 | 149.09619 | 10.259 | [M+H-H2O]+1 | 75166460.14 |
| (2S,3R,4S,5S,6R)-3,4,5-trihydroxy-6-{[4-(2-hydroxypropan-2-yl)cyclohex-1-ene-1-carbonyloxy]methyl}oxan-2-yl 4-(2-hydroxypropan-2-yl)cyclohex-1-ene-1-carboxylate | C26 H40 O10 | 529.28862 | 530.2959 | 16.334 | [M+H]+1 | 72133719.86 |
| 5-Isoxazol-5-yl-N-[4-(4-methylpiperazin-1-yl)benzyl]thiophene-2-sulfonamide | C19 H22 N4 O3 S2 | 418.11137 | 417.1041 | 9.669 | [M-H]-1 | 115679932.9 |
| 2-(2,6-dihydroxyphenyl)-3,5,7-trihydroxy-4H-chromen-4-one | C15 H10 O7 | 302.04253 | 303.0498 | 12.814 | [M+H]+1 | 100951359.1 |
| trans-Cinnamaldehyde | C9 H8 O | 132.05767 | 133.06493 | 9.454 | [M+H]+1 | 62387317.89 |
| N1-bicyclo[2.2.1]hept-5-en-2-yl-2-cyclopentylidenhydrazine-1-carbothioamide | C13 H19 N3 S | 249.13643 | 250.14371 | 7.697 | [M+H]+1 | 298934281.2 |
| ethyl 4,5-dimethyl-2-[(quinolin-6-ylcarbonyl)amino]thiophene-3-carboxylate | C19 H18 N2 O3 S | 308.10482 | 353.10303 | 17.355 | [M+FA-H]-1 | 198930778.2 |
| Fluvastatin | C24 H26 F N O4 | 411.17937 | 412.18665 | 24.516 | [M+H]+1 | 520543535.8 |
| N-Acetyldopamine | C10 H13 N O3 | 195.0897 | 196.097 | 8 | [M+H]+1 | 49617684.08 |
| Phenacetin | C10 H13 N O2 | 179.09466 | 180.10193 | 10.754 | [M+H]+1 | 310471713.8 |
| 3-hydroxy-2-octylpentanedioic acid | C13 H24 O5 | 242.15179 | 243.15907 | 14.263 | [M+H]+1 | 51285062.14 |
| Tetramethylpyrazine | C8 H12 N2 | 136.10024 | 137.10751 | 5.766 | [M+H]+1 | 98726928.83 |
| 4-(6-{[(4R,5S,6R)-4-methoxy-6-methyl-5-{[(2S,3R,4S,5S,6R)-3,4,5-trihydroxy-6-({[(2R,3R,4S,5S,6R)-3,4,5-trihydroxy-6-(hydroxymethyl)oxan-2-yl]oxy}methyl)oxan-2-yl]oxy}oxan-2-yl]oxy}-9,13-dimethyl-17-oxotetracyclo[11.3.1.0Âa,Âaâ°.0â´,âa]heptadecan-14-yl)-2,5-dihydrofuran-2-one | C42 H64 O17 | 840.41335 | 839.40698 | 19.215 | [M-H]-1 | 341841274.2 |
| (1S,3aS,4R,6aR)-1,4-Bis(4-hydroxy-3-methoxyphenyl)dihydro-1H,3H-furo[3,4-c]furan-3a(4H)-yl 6-O-{[(2S,3E,4S)-3-ethylidene-2-(β-D-glucopyranosyloxy)-5-(methoxycarbonyl)-3,4-dihydro-2H-pyran-4-yl]acetyl}-β-D-glucopyranoside | C43 H54 O22 | 922.32887 | 921.32159 | 18.38 | [M-H]-1 | 122031860.6 |
| 3-(1-hydroxyethyl)-2,3,6,7,8,8a-hexahydropyrrolo[1,2-a]pyrazine-1,4-dione | C9 H14 N2 O3 | 198.1006 | 199.10788 | 6.169 | [M+H]+1 | 264419746.6 |
| 6-O-Pentopyranosyl-1-O-[(2,6,6-trimethyl-1-cyclohexen-1-yl)carbonyl]-β-D-glucopyranose | C21 H34 O11 | 508.21536 | 507.20807 | 11.884 | [M-H]-1 | 176290909.6 |
| Methyl (6S)-5-(4-fluorobenzoyl)-3-methyl-4,5,6,7-tetrahydro-3H-imidazo[4,5-c]pyridine-6-carboxylate | C16 H16 F N3 O3 | 317.12217 | 318.12943 | 5.113 | [M+H]+1 | 543948771.6 |
| N-(3-methoxyphenyl)-N'-[2-(2-methyl-4,5-dihydro-1H-imidazol-1-yl)ethyl]urea | C14 H20 N4 O2 | 276.15895 | 277.16623 | 7.105 | [M+H]+1 | 28541451.2 |
| N-({(1S,4S,6S)-6-Isopropyl-3-methyl-4-[2-oxo-2-(1-pyrrolidinyl)ethyl]-2-cyclohexen-1-yl}methyl)-1-phenylmethanesulfonamide | C24 H36 N2 O3 S | 432.2356 | 431.22824 | 16.219 | [M-H]-1 | 83592234.68 |
| Luteolin | C15 H10 O6 | 286.04786 | 285.04059 | 19.48 | [M-H]-1 | 327502364.6 |
| (3R,4S)-4,6,8-Trihydroxy-7-methoxy-3-methyl-3,4-dihydro-1H-isochromen-1-one | C11 H12 O6 | 240.06668 | 239.0594 | 13.56 | [M-H]-1 | 45781107.99 |
| 4-Methoxybenzaldehyde | C8 H8 O2 | 136.05252 | 137.0598 | 8.783 | [M+H]+1 | 93019656.21 |
| 2-[(2S,3R,4S,5R)-5-{[(3-Chlorobenzyl)amino]methyl}-3,4-dihydroxytetrahydro-2-furanyl]-N-cyclopropylacetamide | C17 H23 Cl N2 O4 | 390.11641 | 389.10913 | 6.4 | [M-H]-1 | 90675476.62 |
| N-Benzyl-5-methoxy-1H-indole-2-carboxamide | C17 H16 N2 O2 | 117.05527 | 279.1087 | 7.178 | [2M+FA-H]-1 | 45812637 |
| ethyl 2-{5-[4-(tert-butyl)-1,3-thiazol-2-yl]-3-isopropyl-2,6-dioxo-1,2,3,6-tetrahydropyrimidin-1-yl}acetate | C18 H25 N3 O4 S | 379.16326 | 380.17053 | 9.293 | [M+H]+1 | 20100480.41 |
| 6-Methylindole | C9 H9 N | 131.07363 | 132.0809 | 7.204 | [M+H]+1 | 55699407.07 |
| Trifolin | C21 H20 O11 | 448.10365 | 449.11093 | 12.609 | [M+H]+1 | 17981172.13 |
| ethyl 4-amino-2-(methylsulfanyl)-1,3-thiazole-5-carboxylate | C7 H10 N2 O2 S2 | 218.01917 | 219.02644 | 1.333 | [M+H]+1 | 2208005427 |
| 3,5,7-trihydroxy-2-phenyl-4H-chromen-4-one | C15 H10 O5 | 270.05273 | 271.05978 | 13.824 | [M+H]+1 | 159762662.9 |
| 3,4-dihydroxy-4-(4-methoxyphenyl)-1,2,3,4-tetrahydroquinolin-2-one | C16 H15 N O4 | 267.08562 | 268.09286 | 7.357 | [M+H]+1 | 68372958.68 |
| 5-hydroxy-2-(4-hydroxyphenyl)-8,8-dimethyl-4H,8H-pyrano[3,2-g]chromen-4-one | C20 H16 O5 | 336.09949 | 337.10675 | 18.172 | [M+H]+1 | 120842697.2 |
| 1,2,3,4-Tetrahydroisoquinoline-1-acetic acid | C11 H13 N O2 | 191.09473 | 192.10202 | 6.335 | [M+H]+1 | 198905804.9 |
| 7-hydroxy-2-(4-{[(2S,3R,4S,5S,6R)-3,4,5-trihydroxy-6-(hydroxymethyl)oxan-2-yl]oxy}phenyl)-3,4-dihydro-2H-1-benzopyran-4-one | C21 H22 O9 | 418.12593 | 419.13321 | 12.188 | [M+H]+1 | 198429788.5 |
| Daidzein | C15 H10 O4 | 254.05762 | 253.05034 | 16.267 | [M-H]-1 | 48771219.86 |
| 4-(4-hydroxy-3,5-dimethylphenyl)-2-methylphthalazin-1(2H)-one | C17 H16 N2 O2 | 280.11604 | 279.10876 | 6.944 | [M-H]-1 | 22069502.33 |
| (5ξ,9ξ)-17-Hydroxykaur-15-en-19-oic acid | C20 H30 O3 | 364.22258 | 363.2153 | 19.301 | [M-H]-1 | 36224159.38 |
| trans-Cinnamaldehyde | C9 H8 O | 132.0576 | 133.06488 | 10.975 | [M+H]+1 | 52104224.8 |
| 5-(6-hydroxy-6-methyloctyl)-2,5-dihydrofuran-2-one | C13 H22 O3 | 226.15695 | 209.1537 | 10.242 | [M+H-H2O]+1 | 52125912.99 |
| Acetanilide | C8 H9 N O | 153.07904 | 136.07576 | 11.09 | [M+H-H2O]+1 | 61898135.24 |
| N,N-Dimethylpentylone | C14 H19 N O3 | 249.13646 | 250.14374 | 7.322 | [M+H]+1 | 412053177.2 |
| N1-[4-(acetylamino)phenyl]-2,2-dimethylcyclopropane-1-carboxamide | C14 H18 N2 O2 | 229.10614 | 247.13997 | 1.32 | [M+NH4]+1 | 671413309.7 |
| N-(4-chlorophenyl)-N'-cyclohexylthiourea | C13 H17 Cl N2 S | 268.07925 | 267.07196 | 1.484 | [M-H]-1 | 213363532.3 |
| AB-FUBINACA metabolite 2B | C20 H19 F N4 O4 | 398.14243 | 397.13516 | 6.029 | [M-H]-1 | 55284767.53 |
| benzaldehyde 1-(2,4-dinitrophenyl)hydrazone | C13 H10 N4 O4 | 286.06911 | 285.06183 | 8.785 | [M-H]-1 | 74138553.18 |
| 1-{4-[(3S)-3-(5-Methyl-1H-benzimidazol-2-yl)-1-pyrrolidinyl]-1-piperidinyl}ethanone | C19 H26 N4 O | 348.18948 | 349.19678 | 12.827 | [M+H]+1 | 180451042.1 |
| Pentylone | C13 H17 N O3 | 235.12093 | 236.1282 | 6.822 | [M+H]+1 | 42050585.3 |
| Prostaglandin F3α | C20 H32 O5 | 398.2278 | 397.22052 | 16.491 | [M-H]-1 | 45607270.77 |
| 4-methoxy-6-[2-(4-methoxyphenyl)ethyl]-2H-pyran-2-one | C15 H16 O4 | 282.08905 | 283.09647 | 19.917 | [M+H]+1 | 219379488.1 |
| 3-hydroxy-3-methylpentanedioic acid | C6 H10 O5 | 144.04227 | 145.04955 | 1.342 | [M+H]+1 | 304752619.9 |
| 1-(2-furyl)pentane-1,4-dione | C9 H10 O3 | 188.04798 | 440.11292 | 13.759 | [2M+ACN+Na]+1 | 12086024.89 |
| 4-{2-[2-(Methoxycarbonyl)-3-thienyl]hydrazino}-3-methyl-4-oxo-2-butenoic acid | C11 H12 N2 O5 S | 284.04692 | 283.03964 | 7.724 | [M-H]-1 | 86560883.06 |
| (1S,4S,5R,9R,13S)-5,9-dimethyl-14-methylidenetetracyclo[11.2.1.0Âa,Âaâ°.0â´,âa]hexadec-10-ene-5-carboxylic acid | C20 H28 O2 | 300.20876 | 301.21603 | 17.521 | [M+H]+1 | 40019886.8 |
| N'5-[3-(trifluoromethyl)benzoyl]-2,1,3-benzoxadiazole-5-carbohydrazide | C15 H9 F3 N4 O3 | 350.06712 | 349.05984 | 10.823 | [M-H]-1 | 157660537 |
| 4-Chloro-N-({(1S,4S,6S)-6-isopropyl-3-methyl-4-[2-(4-morpholinyl)-2-oxoethyl]-2-cyclohexen-1-yl}methyl)benzenesulfonamide | C23 H33 Cl N2 O4 S | 408.16325 | 467.17703 | 10.949 | [M-H+HAc]-1 | 22083283.04 |
| ethyl 5-[(2-chlorobenzoyl)amino]-3-methylbenzo[b]thiophene-2-carboxylate | C19 H16 Cl N O3 S | 373.05015 | 372.04288 | 6.565 | [M-H]-1 | 19053673.28 |
| Methyl (2R)-1-(cyclohexylcarbonyl)-4-(methoxyacetyl)-2-piperazinecarboxylate | C16 H26 N2 O5 | 348.16835 | 349.17563 | 12.451 | [M+H]+1 | 114414879.9 |
| 3,5-dimethyl-N'-[4-(trifluoromethyl)benzoyl]isoxazole-4-carbohydrazide | C14 H12 F3 N3 O3 | 328.07951 | 327.07224 | 9.987 | [M-H]-1 | 34106602.3 |
| 4,6-dimethyl-2-(methylamino)-5-nitronicotinonitrile | C9 H10 N4 O2 | 206.07844 | 205.07115 | 8.797 | [M-H]-1 | 945743552.3 |
| Cytidine | C9 H13 N3 O5 | 243.08968 | 244.09695 | 9.661 | [M+H]+1 | 33631522.3 |
| (5S,6S)-5-hydroxy-4-methoxy-6-(2-phenylethyl)-5,6-dihydro-2H-pyran-2-one | C14 H16 O4 | 270.08916 | 271.09631 | 14.823 | [M+H]+1 | 97258479.39 |
| Tetranor-12(S)-HETE | C16 H26 O3 | 288.16814 | 289.17538 | 11.798 | [M+H]+1 | 2106356642 |
| 1-(3,4-dimethylphenyl)-3-piperidinopyrrolidine-2,5-dione | C17 H22 N2 O2 | 286.16429 | 287.17157 | 8.393 | [M+H]+1 | 33662656.61 |
| 6-O-Pentopyranosyl-1-O-[(2,6,6-trimethyl-1-cyclohexen-1-yl)carbonyl]-β-D-glucopyranose | C21 H34 O11 | 508.21544 | 507.20813 | 11.617 | [M-H]-1 | 45341343.52 |
| 1-(4-Methyl-1-piperazinyl)-2-[(3R,4S)-3-({5-[4-(2-methyl-2-propanyl)phenyl]-1,2-oxazol-3-yl}methyl)-4-piperidinyl]ethanone | C26 H38 N4 O2 | 476.25597 | 477.26324 | 17.467 | [M+H]+1 | 48242900.87 |
| Acetyl-L-carnitine | C9 H17 N O4 | 203.11606 | 204.12334 | 9.246 | [M+H]+1 | 31099564.01 |
| (1S,2R,9R,11R,12R,15R)-11-hydroxy-2,6,9,15-tetramethyl-13-oxatetracyclo[10.2.1.0Â?,Âaâ°.0âµ,âa]pentadeca-4,6-diene-3,8,14-trione | C18 H20 O5 | 338.11572 | 339.1228 | 17.728 | [M+H]+1 | 92005093 |
| (1S,2R,9R,11R,12R,15R)-11-hydroxy-2,6,9,15-tetramethyl-13-oxatetracyclo[10.2.1.0Â?,Âaâ°.0âµ,âa]pentadeca-4,6-diene-3,8,14-trione | C18 H20 O5 | 338.11542 | 339.12256 | 17.87 | [M+H]+1 | 89630081.17 |
| (3E,5S,8R,11E,13S,16R)-5,13-dihydroxy-8,16-dimethyl-1,9-dioxacyclohexadeca-3,11-diene-2,10-dione | C16 H24 O6 | 312.1573 | 295.15405 | 17.352 | [M+H-H2O]+1 | 96373752.15 |
| 3-O-β-D-Glucopyranosylandrographolide | C26 H40 O10 | 512.26229 | 511.2551 | 14.607 | [M-H]-1 | 12601770.83 |
| 3,3-dimethyl-2-morpholino-2,3-dihydrobenzo[b]furan-5-ol | C14 H19 N O3 | 249.13659 | 250.14384 | 8.338 | [M+H]+1 | 52272531.74 |
| GLK | C14 H28 N4 O4 | 316.21101 | 317.21826 | 9.91 | [M+H]+1 | 62094631.95 |
| 3,5,7-trihydroxy-2-phenyl-4H-chromen-4-one | C15 H10 O5 | 238.0265 | 271.06 | 17.325 | [M+H+MeOH]+1 | 100746386.8 |
| methyl 5-{[2-(ethoxycarbonyl)-3-oxohex-1-enyl]amino}-2-furoate | C15 H19 N O6 | 309.12147 | 308.11423 | 9.52 | [M-H]-1 | 25574532.09 |
| N1-(4-chlorobenzyl)-1-(2-hydroxyethyl)hydrazine-1-carbothioamide | C10 H14 Cl N3 O S | 259.05929 | 260.06665 | 9.17 | [M+H]+1 | 24745842.14 |
| L-Glutathione oxidized | C20 H32 N6 O12 S2 | 612.14408 | 611.13702 | 7.217 | [M-H]-1 | 27746311.98 |
| N'1-isoxazol-5-ylcarbonyl-4-chlorobenzene-1-carbohydrazide | C11 H8 Cl N3 O3 | 265.02586 | 264.01859 | 4.034 | [M-H]-1 | 54586753.95 |
| 2-(cyclopropylcarbonyl)-3-(4-fluoroanilino)acrylonitrile | C13 H11 F N2 O | 252.06345 | 251.05611 | 12.958 | [M-H]-1 | 16336514.64 |
| 2,3-Dihydro-1H-indol-7-yl(phenyl)methanone | C15 H13 N O | 223.09578 | 224.10307 | 6.482 | [M+H]+1 | 48099558.22 |
| 2-{[1-hydroxy-1-(4-methoxyphenyl)propan-2-yl]oxy}-6-(hydroxymethyl)oxane-3,4,5-triol | C16 H24 O8 | 361.17342 | 362.18069 | 9.186 | [M+H]+1 | 28694449.06 |
| N-cyclohexyl-6,7-dimethoxyquinazolin-4-amine | C16 H21 N3 O2 | 270.13308 | 288.1669 | 5.489 | [M+NH4]+1 | 138340614.3 |
| (1R,9S)-5-[(E)-2-(4-Chlorophenyl)vinyl]-11-(cyclohexylcarbonyl)-7,11-diazatricyclo[7.3.1.02,7]trideca-2,4-dien-6-one | C26 H29 Cl N2 O2 | 436.18584 | 437.19312 | 17.095 | [M+H]+1 | 141545848.8 |
| Ethyl 2-{3-[(4-chloro-2-nitrobenzoyl)amino]-4-methylphenoxy}propanoate | C19 H19 Cl N2 O6 | 406.09321 | 405.08594 | 15.517 | [M-H]-1 | 187187356.4 |
| Hematoxylin | C16 H14 O6 | 302.07924 | 301.07196 | 12.098 | [M-H]-1 | 38196031.61 |
| N1-(3-Piperidinopropyl)-2-[(4-nitrobenzoyl)amino]benzamide | C22 H26 N4 O4 | 428.20452 | 409.18668 | 15.043 | [M-H-H2O]-1 | 32606307.09 |
| 3-{2-[(1R,4aS,5R,6R,8aS)-6-hydroxy-5-(hydroxymethyl)-5,8a-dimethyl-2-methylidene-decahydronaphthalen-1-yl]-1-hydroxyethyl}-2,5-dihydrofuran-2-one | C20 H30 O5 | 367.23558 | 368.24286 | 16.777 | [M+H]+1 | 174523075.1 |
| 5-Sulfosalicylic acid | C7 H6 O6 S | 217.98797 | 216.9807 | 9.382 | [M-H]-1 | 158603707.4 |
| Prostaglandin F3α | C20 H32 O5 | 398.2278 | 397.22052 | 16.261 | [M-H]-1 | 55230062.15 |
| 1,4:3,6-Dianhydro-2,5-dideoxy-2-(5-phenoxy-1H-tetrazol-1-yl)-5-[(phenylcarbamoyl)amino]-L-iditol | C20 H20 N6 O4 | 444.12697 | 443.11969 | 11.217 | [M-H]-1 | 27445179.04 |
| 2-[2-(2-acetamido-4-methylpentanamido)propanamido]-3-hydroxypropanoic acid | C14 H25 N3 O6 | 331.17447 | 332.1817 | 6.863 | [M+H]+1 | 26481633.63 |
| ADBICA | C20 H29 N3 O2 | 326.1943 | 344.22797 | 9.64 | [M+NH4]+1 | 53259511.9 |
| L-Canavanine | C5 H12 N4 O3 | 159.06421 | 177.09802 | 1.185 | [M+NH4]+1 | 2158334306 |
| N'5-[3-(trifluoromethyl)benzoyl]-2,1,3-benzoxadiazole-5-carbohydrazide | C15 H9 F3 N4 O3 | 314.09054 | 349.05994 | 11.574 | [M+Cl]-1 | 43502930.76 |
| Cyheptamide | C16 H15 N O | 237.11123 | 238.1185 | 7.214 | [M+H]+1 | 118283641.5 |
| Perillartine | C10 H15 N O | 165.11565 | 166.12292 | 3.496 | [M+H]+1 | 68895608.67 |
| trans-Zeatin | C10 H13 N5 O | 181.15487 | 220.11803 | 6.754 | [M+K]+1 | 179439560 |
| Bromacil | C9 H13 Br N2 O2 | 199.99905 | 259.01297 | 1.748 | [M-H+HAc]-1 | 152688860.3 |
| Thymidine 5'-monophosphate | C10 H15 N2 O8 P | 322.0569 | 321.04962 | 5.815 | [M-H]-1 | 16833123.94 |
| morpholine-4-carboximidamide hydrobromide | C5 H11 N3 O | 129.09027 | 130.09753 | 1.422 | [M+H]+1 | 1111431738 |
| 2-(6,7-Dimethoxy-3,4-dihydroisoquinolin-1-yl)aniline | C17 H18 N2 O2 | 282.13286 | 283.14008 | 4.672 | [M+H]+1 | 1562778014 |
| 2-Methylbenzophenone | C14 H12 O | 214.0995 | 215.10677 | 10.673 | [M+H]+1 | 8892307.478 |
| 2-[2-oxo-2-(pyridin-3-ylamino)ethoxy]acetic acid | C9 H10 N2 O4 | 210.06815 | 211.07537 | 14.736 | [M+H]+1 | 36839145.54 |
| Ketotifen | C19 H19 N O S | 309.12133 | 310.1286 | 5.917 | [M+H]+1 | 184034935.8 |
| N-(1,3-benzodioxol-5-yl)-7-chloroquinolin-4-amine | C16 H11 Cl N2 O2 | 304.09474 | 303.08746 | 21.797 | [M-H]-1 | 151267013.6 |
| VNK | C15 H29 N5 O5 | 359.22069 | 360.22797 | 10.042 | [M+H]+1 | 72034614.23 |
| Dimethyl sebacate | C12 H22 O4 | 230.15163 | 231.15891 | 14.509 | [M+H]+1 | 30860077.52 |
| 2-(5-Chloro-2-methylanilino)-2-phenylacetonitrile | C15 H13 Cl N2 | 274.08394 | 255.0661 | 15.492 | [M-H-H2O]-1 | 129949082.8 |
| Rupatadine | C26 H26 Cl N3 | 415.1841 | 416.19138 | 5.213 | [M+H]+1 | 175014783 |
| N-Acetylornithine | C7 H14 N2 O3 | 174.10057 | 175.10785 | 1.493 | [M+H]+1 | 56853941.76 |
| 2-oxopiperidine-3-carbohydrazide | C6 H11 N3 O2 | 157.08527 | 158.09254 | 2.275 | [M+H]+1 | 1165486858 |
| 2-oxopiperidine-3-carbohydrazide | C6 H11 N3 O2 | 125.05894 | 158.09242 | 1.478 | [M+H+MeOH]+1 | 600862176.9 |
| (S)-[(2R,4S,5R)-5-Ethenyl-1-azabicyclo[2.2.2]octan-2-yl]-quinolin-4-ylmethanol | C19 H22 N2 O | 256.21826 | 257.22617 | 17.24 | [M+H]+1 | 6383652.875 |
| 4-Methylbenzophenone | C14 H12 O | 196.08891 | 197.09619 | 17.572 | [M+H]+1 | 66483563.58 |
| (2R,3S,4S,5R,6R)-2-({[(2R,3R,4R)-3,4-dihydroxy-4-(hydroxymethyl)oxolan-2-yl]oxy}methyl)-6-{[(2E)-3,7-dimethylocta-2,6-dien-1-yl]oxy}oxane-3,4,5-triol | C21 H36 O10 | 470.21657 | 471.22385 | 12.333 | [M+H]+1 | 18978116.57 |
| 5-(3,5-dichlorophenoxy)-N-(2-methyl-6-quinolinyl)-2-furamide | C21 H14 Cl2 N2 O3 | 412.0312 | 411.02393 | 8.292 | [M-H]-1 | 14012621.15 |
| 4-Methylbenzophenone | C14 H12 O | 196.08895 | 197.09624 | 17.766 | [M+H]+1 | 73073369.31 |
| Guanosine 5'-diphosphate (GDP) | C10 H15 N5 O11 P2 | 443.02522 | 442.01794 | 6.051 | [M-H]-1 | 58586682.59 |
| tetranor-12(R)-HETE | C16 H26 O3 | 283.21453 | 316.24811 | 11.3 | [M+H+MeOH]+1 | 2529075.444 |
| 3-ethyl-5,6-dimethyl-2-thioxo-2,3-dihydrothieno[2,3-d]pyrimidin-4(1H)-one | C10 H12 N2 O S2 | 240.04241 | 299.05634 | 14.042 | [M-H+HAc]-1 | 86104514.36 |
| N-Acetylornithine | C7 H14 N2 O3 | 174.10068 | 175.10796 | 1.94 | [M+H]+1 | 25941803.81 |
| 5-chloro-N-(4-morpholinophenyl)-1H-indole-2-carboxamide | C19 H18 Cl N3 O2 | 317.15731 | 354.10571 | 6.579 | [M-2H+K]-1 | 18347546.52 |
| O1-[4-(tert-butyl)benzoyl]-2-(tert-butylsulfonyl)ethanehydroximamide | C17 H26 N2 O4 S | 390.13487 | 389.12759 | 17.026 | [M-H]-1 | 146281931.9 |
| DL-Tryptophan | C11 H12 N2 O2 | 204.08999 | 205.09726 | 8.86 | [M+H]+1 | 45665090.16 |
| [(3S)-3-(5-Benzyl-1,3,4-oxadiazol-2-yl)-1-pyrrolidinyl](3-pyridinyl)methanone | C19 H18 N4 O2 | 356.12201 | 357.12915 | 6.818 | [M+H]+1 | 25929851.6 |
| 2-{2-Oxo-2-[4-(1H-pyrrol-1-yl)piperidino]ethoxy}acetic acid | C13 H18 N2 O4 | 266.1268 | 267.13406 | 6.563 | [M+H]+1 | 46784493.69 |
| 2-(6,7-Dimethoxy-3,4-dihydroisoquinolin-1-yl)aniline | C17 H18 N2 O2 | 241.10622 | 283.14005 | 1.522 | [M+ACN+H]+1 | 115638347.4 |
| D-(-)-Quinic acid | C7 H12 O6 | 192.06268 | 191.0554 | 5.785 | [M-H]-1 | 305924663.6 |
| Dehydrocholic acid | C24 H34 O5 | 402.24773 | 403.255 | 10.773 | [M+H]+1 | 59107159.74 |
| 4,6-dihydroxy-5a-methyl-3-methylidene-2-oxo-dodecahydronaphtho[1,2-b]furan-9-carbaldehyde | C15 H20 O5 | 302.11518 | 303.12247 | 15.829 | [M+H]+1 | 194080904.6 |
| ethyl 4,5-dimethyl-2-[(quinolin-6-ylcarbonyl)amino]thiophene-3-carboxylate | C19 H18 N2 O3 S | 372.12066 | 353.10287 | 16.26 | [M-H-H2O]-1 | 70134790.72 |
| 7-(4-methoxyphenyl)-10-methyl-7,9-dihydro-6H,8H-chromeno[3',4':5,6]pyrano[2,3-d]pyrimidine-6,8-dione | C22 H16 N2 O5 | 388.10084 | 387.09357 | 7.547 | [M-H]-1 | 11534224.19 |
| 3-benzyl-2-thioxo-1,3-thiazolan-4-one | C10 H9 N O S2 | 223.01466 | 222.00739 | 2.884 | [M-H]-1 | 61888870.21 |
| (2E)-3-(2-{[(2S,3R,4S,5S,6R)-3,4,5-trihydroxy-6-(hydroxymethyl)oxan-2-yl]oxy}phenyl)prop-2-enoic acid | C15 H18 O8 | 343.12693 | 344.13416 | 3.337 | [M+H]+1 | 318615053.7 |
| Tramadol N-Oxide | C16 H25 N O3 | 279.18364 | 280.19092 | 6.052 | [M+H]+1 | 9772543.505 |
| 4-{5-[1-methyl-5-(trifluoromethyl)-1H-pyrazol-3-yl]-2-thienyl}pyrimidine-2-thiol | C13 H9 F3 N4 S2 | 342.02571 | 341.01843 | 4.631 | [M-H]-1 | 50791191.24 |
| N1-[2,2,2-trifluoro-1-(phenethylamino)-1-(trifluoromethyl)ethyl]-2-ethoxybenzamide | C20 H20 F6 N2 O2 | 434.14254 | 479.1409 | 6.572 | [M+FA-H]-1 | 21818617.12 |
| NKK | C16 H32 N6 O5 | 388.24708 | 389.25433 | 13.533 | [M+H]+1 | 214813514.1 |
| 3-(2,4-dihydroxyphenyl)-7-hydroxy-6,8-bis(3-methylbut-2-en-1-yl)-4H-chromen-4-one | C25 H26 O5 | 406.17799 | 407.1853 | 19.724 | [M+H]+1 | 81665290.96 |
| 3-O-β-D-Glucopyranosylandrographolide | C26 H40 O10 | 512.26188 | 511.25461 | 16.317 | [M-H]-1 | 53647756.15 |
| Isopropyl 4-hydroxybenzoate | C10 H12 O3 | 180.07768 | 179.0704 | 12.32 | [M-H]-1 | 31938873.17 |
| N-({(2R,4S,5R)-5-[3-(3,4-Dimethoxyphenyl)-1-methyl-1H-pyrazol-5-yl]-1-azabicyclo[2.2.2]oct-2-yl}methyl)-4-methoxybenzamide | C28 H34 N4 O4 | 526.24153 | 525.23425 | 12.086 | [M-H]-1 | 280210831.8 |
| N'1-(2-Chlorobenzylidene)-4-hydroxy-3-(methylthio)-4,5,6,7-tetrahydrobenzo[c]thiophene-1-carbohydrazide | C17 H17 Cl N2 O2 S2 | 380.04136 | 379.03409 | 7.122 | [M-H]-1 | 63594472.82 |
| 4-Methylumbelliferone hydrate | C10 H8 O3 | 176.04753 | 177.05481 | 8.709 | [M+H]+1 | 304041749.6 |
| 1-(3-Cyanophenyl)-3-{[(2R,4S,5R)-5-(3-cyclohexyl-1-methyl-1H-pyrazol-5-yl)-1-azabicyclo[2.2.2]oct-2-yl]methyl}urea | C26 H34 N6 O | 482.25165 | 481.2442 | 12.209 | [M-H]-1 | 61864686.15 |
| 2-[(2-Methylimidazo[1,2-a]pyridin-3-yl)carbonyl]hydrazine-1-carboxamide | C10 H11 N5 O2 | 233.08982 | 234.09708 | 1.305 | [M+H]+1 | 1031202093 |
| methyl 2-[(4aR,5R,6R,7S,8aR)-8a-ethenyl-5,7-dihydroxy-4-methylidene-3-oxo-octahydro-1H-2-benzopyran-6-yl]prop-2-enoate | C16 H20 O6 | 258.08916 | 259.0965 | 14.722 | [M+H]+1 | 22918821.44 |
| (5-Amino[1,2,3]triazolo[1,5-a]quinazolin-3-yl)(morpholino)methanone | C14 H14 N6 O2 | 238.09555 | 297.10941 | 7.719 | [M-H+HAc]-1 | 26116194.34 |
| Carbetamide | C12 H16 N2 O3 | 236.11635 | 237.12363 | 5.438 | [M+H]+1 | 27470631.91 |
| 2-[(1S,4S,5S)-5-Isopropyl-4-{[(isopropylcarbamoyl)amino]methyl}-2-methyl-2-cyclohexen-1-yl]-N-methyl-N-(3-pyridinylmethyl)acetamide | C24 H38 N4 O2 | 450.28288 | 449.2756 | 15.891 | [M-H]-1 | 205744677.1 |
| Methyl 5-methoxy-2-(3-methoxyphenoxy)benzoate | C16 H16 O5 | 288.09972 | 289.10703 | 14.635 | [M+H]+1 | 85162749.52 |
| 2-Methoxybenzaldehyde | C8 H8 O2 | 136.05248 | 137.05975 | 12.851 | [M+H]+1 | 84304724.47 |
| Sedanolide | C12 H18 O2 | 194.13058 | 227.164 | 15.825 | [M+H+MeOH]+1 | 84104673.7 |
| 4-[(3R)-7-hydroxy-5-methoxy-6-(3-methylbut-2-en-1-yl)-3,4-dihydro-2H-1-benzopyran-3-yl]-2-(3-methylbut-2-en-1-yl)benzene-1,3-diol | C26 H32 O5 | 424.23218 | 425.23941 | 6.839 | [M+H]+1 | 37904876.03 |
| ethyl 4,5-dimethyl-2-[(quinolin-6-ylcarbonyl)amino]thiophene-3-carboxylate | C19 H18 N2 O3 S | 354.11012 | 353.10287 | 16.848 | [M-H]-1 | 731528158.2 |
| 3-Succinoylpyridine | C9 H9 N O3 | 179.05841 | 180.06569 | 8.528 | [M+H]+1 | 104731718.7 |
| 3-(1H-benzo[d]imidazol-2-yl)-6-ethyl-7-hydroxy-4H-chromen-4-one | C18 H14 N2 O3 | 274.07001 | 307.10367 | 7.787 | [M+H+MeOH]+1 | 33331355.73 |
| VNK | C15 H29 N5 O5 | 359.22045 | 360.22772 | 9.763 | [M+H]+1 | 106897648.6 |
| 3-(2,4-dihydroxyphenyl)-5,7-dihydroxy-6,8-bis(3-methylbut-2-en-1-yl)-3,4-dihydro-2H-1-benzopyran-4-one | C25 H28 O6 | 424.18822 | 425.19543 | 18.444 | [M+H]+1 | 242238400.9 |
| 2-[(2-Methylimidazo[1,2-a]pyridin-3-yl)carbonyl]hydrazine-1-carboxamide | C10 H11 N5 O2 | 255.07433 | 256.08157 | 6.667 | [M+H]+1 | 43558825.37 |
| 2-(hydroxymethyl)-6-{5-[3-(hydroxymethyl)-5-(3-hydroxypropyl)-7-methoxy-2,3-dihydro-1-benzofuran-2-yl]-2-methoxyphenoxy}oxane-3,4,5-triol | C26 H34 O11 | 539.23631 | 540.24359 | 11.713 | [M+H]+1 | 122691862.3 |
| 7-{[4,5-dihydroxy-6-(hydroxymethyl)-3-{[(2S,3R,4R,5R,6S)-3,4,5-trihydroxy-6-methyloxan-2-yl]oxy}oxan-2-yl]oxy}-5-hydroxy-2-(4-hydroxyphenyl)-3,4-dihydro-2H-1-benzopyran-4-one | C27 H32 O14 | 290.08977 | 579.17218 | 11.175 | [2M-H]-1 | 30096383.99 |
| 4-Hydroxycoumarin | C9 H6 O3 | 162.03068 | 161.02339 | 11.127 | [M-H]-1 | 21571565.61 |
| Nicotinaldehyde N-(6,7-dihydro-5H-cyclopenta[d][1,2,4]triazolo[1,5-a]pyrimidin-8-yl)hydrazone | C14 H13 N7 | 279.12227 | 280.12955 | 8.668 | [M+H]+1 | 34262514.5 |
| 7-[3-(trifluoromethyl)phenyl]-4,5-dihydropyrazolo[1,5-a]pyrimidine-3-carboxamide | C14 H11 F3 N4 O | 308.09318 | 307.08591 | 15.321 | [M-H]-1 | 50545995.51 |
| 4-Methylumbelliferone hydrate | C10 H8 O3 | 176.04754 | 177.05482 | 8.24 | [M+H]+1 | 140648515.6 |
| Tyrosylalanine | C12 H16 N2 O4 | 252.11113 | 251.10385 | 6.024 | [M-H]-1 | 16636724.2 |
| Sibiricose A3 | C19 H26 O13 | 462.13763 | 461.13034 | 7.783 | [M-H]-1 | 63345960.09 |
| 5-amino-1-phenyl-1H-pyrazole-4-carbohydrazide | C10 H11 N5 O | 217.09472 | 216.08731 | 8.31 | [M-H]-1 | 34368557.59 |
| 2-({[(2R,4S,5R)-5-{2-Methyl-6-[4-(trifluoromethyl)phenyl]-4-pyrimidinyl}-1-azabicyclo[2.2.2]oct-2-yl]methyl}carbamoyl)benzoic acid | C28 H27 F3 N4 O3 | 232.09457 | 523.20306 | 9.332 | [2M-H+HAc]-1 | 31075613.11 |
| 5-{5-[(2S)-1-(Cyclopropylmethyl)-2-pyrrolidinyl]-1,2,4-oxadiazol-3-yl}-N-(2-methoxyethyl)-2-pyridinamine | C18 H25 N5 O2 | 365.18395 | 366.19122 | 8.604 | [M+H]+1 | 40688319.13 |
| 2-(2-amino-3-methylbutanamido)-3-phenylpropanoic acid | C14 H20 N2 O3 | 264.14751 | 265.15479 | 7.426 | [M+H]+1 | 38828586.85 |
| 5,8-dihydroxy-10-methyl-5,8,9,10-tetrahydro-2H-oxecin-2-one | C10 H14 O4 | 148.05246 | 181.08594 | 10.973 | [M+H+MeOH]+1 | 121044157.8 |
| 2-[(3S)-1-(2-Pyridinylmethyl)-3-pyrrolidinyl]-1H-benzimidazole-5-carbonitrile | C18 H17 N5 | 151.57724 | 304.16132 | 1.269 | [2M+H]+1 | 50771633.6 |
| 15,16-dimethoxytricyclo[12.3.1.1Â?,â¶]nonadeca-1(18),2,4,6(19),14,16-hexaene-3,9,17-triol | C21 H26 O5 | 358.17421 | 359.18149 | 5.635 | [M+H]+1 | 57159541.95 |
| Disperse orange 3 | C12 H10 N4 O2 | 242.07914 | 243.08655 | 8.402 | [M+H]+1 | 28030257.98 |
| 1-{[5-(hydroxymethyl)-2,5,8a-trimethyl-1,4,4a,5,6,7,8,8a-octahydronaphthalen-1-yl]methyl}-4-methylidene-7-oxabicyclo[4.1.0]heptane-2,3,5-triol | C22 H34 O5 | 395.26692 | 396.2742 | 16.761 | [M+H]+1 | 23275697.54 |
| N-cyclooctylurea | C9 H18 N2 O | 170.14192 | 171.1492 | 12.816 | [M+H]+1 | 166681945.6 |
| 1-(4-Trifluoromethylphenyl)piperazine | C11 H13 F3 N2 | 230.1057 | 231.11301 | 9.492 | [M+H]+1 | 39964602.83 |
| Cinchophen | C16 H11 N O2 | 249.07898 | 250.08626 | 20.42 | [M+H]+1 | 42267523.11 |
| ({2-[(1R,9S)-5-(2-Naphthyl)-6-oxo-7,11-diazatricyclo[7.3.1.02,7]trideca-2,4-dien-11-yl]-2-oxoethyl}sulfanyl)acetic acid | C25 H24 N2 O4 S | 448.14036 | 447.13309 | 15.27 | [M-H]-1 | 30398610.24 |
| N1-[2,2,2-trifluoro-1-(phenethylamino)-1-(trifluoromethyl)ethyl]-2-ethoxybenzamide | C20 H20 F6 N2 O2 | 434.14255 | 433.13522 | 6.812 | [M-H]-1 | 15935601.75 |
| 3,8,9-trihydroxy-10-propyl-3,4,5,8,9,10-hexahydro-2H-oxecin-2-one | C12 H20 O5 | 244.13089 | 243.1236 | 12.937 | [M-H]-1 | 130290471 |
| 3,3',5,5'-Tetramethyldiphenoquinone | C16 H16 O2 | 240.11109 | 241.11836 | 4.482 | [M+H]+1 | 94673644.17 |
| N-(4-Fluorobenzyl)-2-[(1S,4S,5S)-5-isopropyl-2-methyl-4-{[(propylsulfonyl)amino]methyl}-2-cyclohexen-1-yl]acetamide | C23 H35 F N2 O3 S | 474.21031 | 473.20303 | 8.902 | [M-H]-1 | 21997150.66 |
| Chlorpropamide | C10 H13 Cl N2 O3 S | 276.03084 | 275.02356 | 6.776 | [M-H]-1 | 16200361.09 |
| Stiripentol | C14 H18 O3 | 216.11484 | 249.14828 | 13.749 | [M+H+MeOH]+1 | 430120193.6 |
| (-)-Camphanic acid | C10 H14 O4 | 198.08848 | 197.08121 | 9.242 | [M-H]-1 | 34727304.93 |
| Irgarol 1051 | C11 H19 N5 S | 253.1313 | 254.13858 | 4.918 | [M+H]+1 | 2866694663 |
| δ-Ribono-1,4-lactone | C5 H8 O5 | 148.03612 | 147.02884 | 3.257 | [M-H]-1 | 691582740.9 |
| 2,3-dinor Prostaglandin E1 | C18 H30 O5 | 308.1988 | 307.19153 | 16.561 | [M-H]-1 | 136752310.7 |
| 4-{3-[(3,4-dihydroxyphenyl)methyl]-2-methylbutyl}benzene-1,2-diol | C18 H22 O4 | 324.1319 | 325.13898 | 10.917 | [M+H]+1 | 53225159.94 |
| Propyl gallate | C10 H12 O5 | 212.07158 | 211.0643 | 8.501 | [M-H]-1 | 21429369.65 |
| Cyclohexyl phenyl ketone | C13 H16 O | 188.12026 | 189.12753 | 10.436 | [M+H]+1 | 57547330.45 |
| 7-{[4,5-dihydroxy-6-(hydroxymethyl)-3-{[(2S,3R,4R,5R,6S)-3,4,5-trihydroxy-6-methyloxan-2-yl]oxy}oxan-2-yl]oxy}-5-hydroxy-2-(4-hydroxyphenyl)-3,4-dihydro-2H-1-benzopyran-4-one | C27 H32 O14 | 626.18464 | 625.17737 | 15.268 | [M-H]-1 | 14771284.76 |
| (3S,9aS)-3-benzyl-octahydro-1H-pyrido[1,2-a]pyrazin-1-one | C15 H20 N2 O | 266.13793 | 267.1452 | 6.56 | [M+H]+1 | 28398825.53 |
| 6-(1,3-benzodioxol-5-ylmethyl)-1,3-dimethyl-5,6,7,8-tetrahydropyrimido[4,5-d]pyrimidine-2,4(1H,3H)-dione | C16 H18 N4 O4 | 330.13164 | 329.12436 | 10.96 | [M-H]-1 | 66808560.99 |
| JWH 016 | C24 H23 N O | 324.15704 | 307.15375 | 13.631 | [M+H-H2O]+1 | 61792102.24 |
| 4-(2-thienyl)benzoic acid | C11 H8 O2 S | 204.02641 | 203.01913 | 3.118 | [M-H]-1 | 519625145.3 |
| N-(cyclopropylmethyl)-N'-phenylurea | C11 H14 N2 O | 114.03181 | 132.06566 | 1.308 | [M+NH4]+1 | 61123100.77 |
| Picroside II | C23 H28 O13 | 512.15306 | 511.14578 | 13.028 | [M-H]-1 | 321407751.4 |
| Heptanophenone | C13 H18 O | 190.1358 | 191.14307 | 12.904 | [M+H]+1 | 248424879.4 |
| 4-(dimethylamino)-1,1-diphenylbut-3-en-2-one | C18 H19 N O | 265.15227 | 266.15955 | 1.167 | [M+H]+1 | 102998591 |
| CMPF | C12 H16 O5 | 240.0995 | 239.09222 | 10.479 | [M-H]-1 | 17978126.45 |
| 2,5-bis(4-hydroxy-3-methoxyphenyl)-3,4-dimethyloxolan-3-ol | C20 H24 O6 | 360.15691 | 343.15359 | 11.711 | [M+H-H2O]+1 | 63402660.38 |
| FUB-144 | C23 H24 F N O | 349.18862 | 350.19589 | 9.143 | [M+H]+1 | 971123241.8 |
| 4-(1-Adamantyl)-2-[4-(trifluoromethoxy)phenyl]-1,3-thiazole | C20 H20 F3 N O S | 379.12657 | 380.13385 | 7.852 | [M+H]+1 | 40153906.38 |
| 8-(1,2-dihydroxy-3-methylbut-3-en-1-yl)-7-methoxy-2H-chromen-2-one | C15 H16 O5 | 314.05776 | 315.06503 | 18.539 | [M+H]+1 | 8563815.455 |
| 5,7-Dihydroxy-4-(4-methoxyphenyl)-2-chromanone | C16 H14 O5 | 286.08415 | 285.07687 | 19.631 | [M-H]-1 | 29520541.12 |
| N-(cyclopropylmethyl)-2-[2-(3,4-dimethoxyphenyl)acetyl]hydrazine-1-carbothioamide | C15 H21 N3 O3 S | 646.26583 | 322.12564 | 18.647 | [M-2H]-2 | 47554252.73 |
| D-(-)-Quinic acid | C7 H12 O6 | 192.06281 | 191.05554 | 12.393 | [M-H]-1 | 72743235.9 |
| 3-(4-chlorophenyl)-5-methyl-2,5-dihydro-1,2,4-oxadiazole | C9 H9 Cl N2 O | 196.03993 | 195.03265 | 8.724 | [M-H]-1 | 22517204.77 |
| 4-Pyridoxic acid | C8 H9 N O4 | 183.0524 | 182.04512 | 6.894 | [M-H]-1 | 19128912.97 |
| (3aR,4R,11aR)-4-hydroxy-10-(hydroxymethyl)-3-methylidene-2-oxo-2H,3H,3aH,4H,5H,8H,9H,11aH-cyclodeca[b]furan-6-carbaldehyde | C15 H18 O5 | 260.10454 | 261.11182 | 13.768 | [M+H]+1 | 49543468.13 |
| 1-(4-Trifluoromethylphenyl)piperazine | C11 H13 F3 N2 | 230.10562 | 231.1129 | 8.892 | [M+H]+1 | 82391146.52 |
| Phthaldialdehyde | C8 H6 O2 | 134.03685 | 167.07033 | 11.114 | [M+H+MeOH]+1 | 89664122.75 |
| 1-(4-Benzyl-1-piperidinyl)-2-[(3R,4S)-3-{[5-(4-morpholinylmethyl)-1,2-oxazol-3-yl]methyl}-4-piperidinyl]ethanone | C28 H40 N4 O3 | 516.29106 | 517.2984 | 8.236 | [M+H]+1 | 29162680.77 |
| 4-methoxy-9-(2-methylbut-3-en-2-yl)-7H-furo[3,2-g]chromen-7-one | C17 H16 O4 | 252.07842 | 285.11191 | 19.918 | [M+H+MeOH]+1 | 495896942.2 |
| 3',4'-Dimethoxyacetophenone | C10 H12 O3 | 180.0787 | 181.086 | 12.863 | [M+H]+1 | 98847966.28 |
| 3-phenyl-5-(1,2,3-thiadiazol-4-yl)-1,2,4-oxadiazole | C10 H6 N4 O S | 219.98244 | 253.0159 | 9.092 | [M+H+MeOH]+1 | 34834999.06 |
| Norepinephrine | C8 H11 N O3 | 169.07298 | 168.0657 | 7.009 | [M-H]-1 | 24067071.85 |
| N-({(2R,4S,5R)-5-[2-Methyl-6-(2-thienyl)-4-pyrimidinyl]-1-azabicyclo[2.2.2]oct-2-yl}methyl)-4-(trifluoromethyl)benzamide | C25 H25 F3 N4 O S | 476.15312 | 521.15131 | 7.131 | [M+FA-H]-1 | 28478027.45 |
| Safrole | C10 H10 O2 | 162.06825 | 195.10182 | 9.653 | [M+H+MeOH]+1 | 28763186.99 |
| 6-Deoxyhexopyranosyl-(1-4)-[hexopyranosyl-(1-6)]-1-O-[27-hydroxy-3,27,28-trioxolup-20(29)-en-28-yl]hexopyranose | C48 H74 O19 | 954.48396 | 953.47589 | 17.905 | [M-H]-1 | 17767278.76 |
| (2S,3Z,4S)-2-(β-D-Glucopyranosyloxy)-3-(2-{[(2E)-3-(4-hydroxyphenyl)-2-propenoyl]oxy}ethylidene)-4-(2-methoxy-2-oxoethyl)-3,4-dihydro-2H-pyran-5-carboxylic acid | C26 H30 O14 | 566.16365 | 565.15637 | 12.492 | [M-H]-1 | 93692251.87 |
| Ouabain | C29 H44 O12 | 1168.56626 | 583.27582 | 16.399 | [M-2H]-2 | 131050537.9 |
| Pioglitazone | C19 H20 N2 O3 S | 356.12564 | 355.11844 | 16.115 | [M-H]-1 | 315830476.7 |
| 3-[4-(Trifluoromethoxy)phenyl]acrylic acid | C10 H7 F3 O3 | 232.03677 | 231.0295 | 13.514 | [M-H]-1 | 406677734.9 |
| 1-(1-Hydroxybutyl)-1,3,4,5,6,7-hexahydro-2-benzofuran-4,5,6,7-tetrol | C12 H20 O6 | 260.12605 | 259.11877 | 13.158 | [M-H]-1 | 87819336.64 |
| 7-{[(2E)-3,7-Dimethyl-2,6-octadien-1-yl]oxy}-1,3-dihydroxy-9H-xanthen-9-one | C23 H24 O5 | 380.16836 | 425.16663 | 10.189 | [M+FA-H]-1 | 204602901.5 |
| Naringin | C27 H32 O14 | 580.17918 | 581.18646 | 15.264 | [M+H]+1 | 125622652 |
| Alprenolol | C15 H23 N O2 | 249.17302 | 250.1803 | 8.214 | [M+H]+1 | 21316130.43 |
| Tretinoin | C20 H28 O2 | 300.20894 | 299.20166 | 20.662 | [M-H]-1 | 3995203.839 |
| Lamiide | C17 H26 O12 | 376.13707 | 421.13528 | 4.801 | [M+FA-H]-1 | 33663604.88 |
| FUB-144 | C23 H24 F N O | 349.18886 | 350.19614 | 9.604 | [M+H]+1 | 312482258.1 |
| 5-Hydroxyindole-3-acetic acid | C10 H9 N O3 | 191.0584 | 192.06566 | 9.656 | [M+H]+1 | 35454037.85 |
| 4-[({5-[4-(tert-butyl)phenyl]-4H-1,2,4-triazol-3-yl}thio)methyl]-2-methyl-1,3-thiazole | C17 H20 N4 S2 | 344.114 | 343.10672 | 15.164 | [M-H]-1 | 36964269.52 |
| Carbidopa | C10 H14 N2 O4 | 226.09527 | 227.10265 | 6.48 | [M+H]+1 | 110417764.4 |
| Benzyl 6-O-beta-D-glucopyranosyl-beta-D-glucopyranoside | C19 H28 O11 | 432.16315 | 477.16144 | 9.741 | [M+FA-H]-1 | 11638235.96 |
| N-({(2R,3S,4R,5S)-3,4-Dihydroxy-5-[2-(isopropylamino)-2-oxoethyl]tetrahydro-2-furanyl}methyl)-3-fluorobenzamide | C17 H23 F N2 O5 | 390.13487 | 389.12759 | 15.377 | [M-H]-1 | 37990133.56 |
| methyl 2-{9-hydroxy-1-methyl-5,10-dioxo-1H,3H,4H,5H,10H-naphtho[2,3-c]pyran-3-yl}acetate | C17 H16 O6 | 316.0946 | 317.1019 | 13.341 | [M+H]+1 | 103688999.7 |
| 4-methyl-5-{2-[4-(2-pyridinyl)piperazino]acetyl}-1,3,4,5-tetrahydro-2H-1,5-benzodiazepin-2-one | C21 H25 N5 O2 | 379.19936 | 380.20663 | 10.135 | [M+H]+1 | 32699572.22 |
| Resorcinol diglycidyl ether | C12 H14 O4 | 222.08932 | 223.09663 | 15.219 | [M+H]+1 | 26937975.57 |
| Propyl gallate | C10 H12 O5 | 152.04661 | 211.0607 | 7.673 | [M-H+HAc]-1 | 37558429.6 |
| 4-Isobutylbenzoic acid | C11 H14 O2 | 178.0994 | 179.10678 | 12.158 | [M+H]+1 | 63718367.17 |
| 3-Methoxy-4-(3-methyl-2-buten-1-yl)-5-[(E)-2-phenylvinyl]phenol | C20 H22 O2 | 294.16207 | 295.16934 | 18.108 | [M+H]+1 | 8182888.608 |
| BB-22 3-Carboxyindole metabolite | C16 H19 N O2 | 257.13774 | 258.14502 | 9.543 | [M+H]+1 | 38473470.73 |
| Heptanophenone | C13 H18 O | 190.13584 | 191.14311 | 14.089 | [M+H]+1 | 119071886.1 |
| N-Benzyl-5-methoxy-1H-indole-2-carboxamide | C17 H16 N2 O2 | 280.11604 | 279.10876 | 6.254 | [M-H]-1 | 20088816.97 |
| 4-tert-Butylcyclohexyl acetate | C12 H22 O2 | 198.16194 | 199.16922 | 19.208 | [M+H]+1 | 284361050.4 |
| (2R,3S,4S,5R,6R)-2-(hydroxymethyl)-6-(propan-2-yloxy)oxane-3,4,5-triol | C9 H18 O6 | 222.11198 | 264.14566 | 6.596 | [M+ACN+H]+1 | 8601121.365 |
| (3S,3aR,4S,4aR,7aR,8R,9aR)-3,4a,8-trimethyl-2,5-dioxo-2H,3H,3aH,4H,4aH,5H,7aH,8H,9H,9aH-azuleno[6,5-b]furan-4-yl 2-methylpropanoate | C19 H26 O5 | 334.17764 | 335.18484 | 15.809 | [M+H]+1 | 122579025.2 |
| Verproside | C22 H26 O13 | 498.13731 | 497.13004 | 12.719 | [M-H]-1 | 107394516.3 |
| 3-methyl-5-oxo-5-(4-toluidino)pentanoic acid | C13 H17 N O3 | 257.10265 | 258.10992 | 1.376 | [M+H]+1 | 1071494072 |
| 6,18,19-Trihydroxytrachyloban-2-one | C20 H30 O4 | 380.21754 | 379.21027 | 18.096 | [M-H]-1 | 18256546.53 |
| 2-Arachidonoyl glycerol | C23 H38 O4 | 378.27656 | 379.28394 | 21.665 | [M+H]+1 | 34284658.6 |
| 2-(1,3-Benzodioxol-5-yl)-4,5,6,7-tetramethyl-1H-benzimidazole | C18 H18 N2 O2 | 294.13179 | 293.12451 | 7.974 | [M-H]-1 | 23722117.31 |
| 1-(3-ethyl-2,4-dihydroxy-6-methoxyphenyl)butan-1-one | C13 H18 O4 | 220.11001 | 253.14345 | 15.25 | [M+H+MeOH]+1 | 62379767.2 |
| trans-3,4-Difluorocinnamic acid | C9 H6 F2 O2 | 184.03642 | 183.02914 | 6.662 | [M-H]-1 | 34676006.58 |
| (4-benzylpiperazino)(4-methylphenyl)methanone | C19 H22 N2 O | 294.16933 | 277.16605 | 8.535 | [M+H-H2O]+1 | 243067646.6 |
